# Supplementary material
Source: Research Square preprint supplement (doi:10.21203/rs.3.rs-9645588/v1)
Supplement: Supplementary file 1 [file a4ba35e7fc0351c02415ee7f.docx]

# Additional Files

### Additional File 1: Enhancing Transparency in Reporting the synthesis of Qualitative research (ENTREQ) statement217

| **No** | **Item** | **Guide and description** | **Page Number Reported** |
| --- | --- | --- | --- |
| **1** | Aim | State the research question the synthesis addresses. | 4 |
| **2** | Synthesis methodology | Identify the synthesis methodology or theoretical framework which underpins the synthesis and describe the rationale for choice of methodology *(e.g. meta-ethnography, thematic synthesis, critical interpretive synthesis, grounded theory synthesis, realist synthesis, meta-aggregation, meta-study, framework synthesis).* | 4, 8 |
| **3** | Approach to searching | Indicate whether the search was pre-planned (*comprehensive search strategies to seek all available studies)* or iterative (*to seek all available concepts until they theoretical saturation is achieved)*. | 4-5 |
| **4** | Inclusion criteria | Specify the inclusion/exclusion criteria *(e.g. in terms of population, language, year limits, type of publication, study type).* | 5-6 |
| **5** | Data sources | Describe the information sources used (e.g. *electronic databases (MEDLINE, EMBASE, CINAHL, psycINFO, Econlit), grey literature databases (digital thesis, policy reports), relevant organisational websites, experts, information specialists, generic web searches (Google Scholar) hand searching, reference lists)* and when the searches conducted; provide the rationale for using the data sources. | 5 |
| **6** | Electronic Search strategy | Describe the literature search *(e.g. provide electronic search strategies with population terms, clinical or health topic terms, experiential or social phenomena related terms, filters for qualitative research, and search limits)*. | 5-6 Additional File 2 |
| **7** | Study screening methods | Describe the process of study screening and sifting *(e.g. title, abstract and full text review, number of independent reviewers who screened studies).* | 6-7 |
| **8** | Study characteristics | Present the characteristics of the included studies *(e.g. year of publication, country, population, number of participants, data collection, methodology, analysis, research questions).* | 9-12, Additional File 3 |
| **9** | Study selection results | Identify the number of studies screened and provide reasons for study exclusion *(e.g., for comprehensive searching, provide numbers of studies screened and reasons for exclusion indicated in a figure/flowchart; for iterative searching describe reasons for study exclusion and inclusion based on modifications to the research question and/or contribution to theory development).* | 7, 9 |
| **10** | Rationale for appraisal | Describe the rationale and approach used to appraise the included studies or selected findings *(e.g. assessment of conduct (validity and robustness), assessment of reporting (transparency), assessment of content and utility of the findings).* | 6 |
| **11** | Appraisal items | State the tools, frameworks and criteria used to appraise the studies or selected findings (e.g. Existing tools: CASP, QARI, COREQ, Mays and Pope [25]; reviewer developed tools; describe the domains assessed: research team, study design, data analysis and interpretations, reporting). | 6, 8 |
| **12** | Appraisal process | Indicate whether the appraisal was conducted independently by more than one reviewer and if consensus was required. | 6, 8 |
| **13** | Appraisal results | Present results of the quality assessment and indicate which articles, if any, were weighted/excluded based on the assessment and give the rationale. | 12, Additional File 4 |
| **14** | Data extraction | Indicate which sections of the primary studies were analysed and how were the data extracted from the primary studies? *(e.g. all text under the headings “results /conclusions” were extracted electronically and entered into a computer software).* | 6 |
| **15** | Software | State the computer software used, if any. | 6 |
| **16** | Number of reviewers | Identify who was involved in coding and analysis. | 8 |
| **17** | Coding | Describe the process for coding of data *(e.g. line by line coding to search for concepts).* | 6, 8 |
| **18** | Study comparison | Describe how were comparisons made within and across studies *(e.g. subsequent studies were coded into pre-existing concepts, and new concepts were created when deemed necessary).* | 8 |
| **19** | Derivation of themes | Explain whether the process of deriving the themes or constructs was inductive or deductive. | 8 |
| **20** | Quotations | Provide quotations from the primary studies to illustrate themes/constructs, and identify whether the quotations were participant quotations of the author’s interpretation. | 14, 16, 28-39 |
| **21** | Synthesis output | Present rich, compelling and useful results that go beyond a summary of the primary studies (e.g. *new interpretation, models of evidence, conceptual models, analytical framework, development of a new theory or construct).* | 15, 16-28, 29-29, 40-43 |

### Additional File 2: Example Database Search – MEDLINE

Searches conducted to end November 2025

1. exp Pregnant Women/
2. exp Mothers/
3. 1 or 2
4. (interpret* or translat*).mp
5. exp Communication Barriers/
6. ((language or communication) adj3 barrier).mp
7. 4 or 5 or 6
8. exp Maternal Health Services/ or Maternal Health/
9. ("maternity care" or "maternity services").mp
10. 8 or 9
11. (experience* or view* or perception* or attitude* or belief* or satisfaction or opinion* or feeling* or perspective* or qualitative).mp
12. 3 and 7 and 10 and 11
13. Limit 12 to (English language and yr=2013-2024

### **Additional File** 3. Summary of study characteristics

| **Authors, Date**  **Title** | **Year** | **Country** | **Aim** | **Qualitative Methods** | **N = Women Participants** | **Sample Characteristics** | **Time since maternity care** | **Contextual Thickness: thick/thin** | **Conceptual Richness: rich/poor** |
| --- | --- | --- | --- | --- | --- | --- | --- | --- | --- |
| Alruwaili et al 2025;    Women and husbands’ experiences and expectations of shared decision-making during pregnancy and childbirth in Saudi Arabia: A qualitative study; Alrwali, T. A., Fooladi, E. and Crawford, K. Midwifery 148 (2025)  <https://doi.org/10.1016/j.midw.2025.104533> | **2025** | **Saudi Arabia** | To explore the experiences and expectations of women and husbands regarding SDM in maternity care in Saudi Arabia | Data collection: semi structured interviews; Data analysis: thematic analysis | **19** | Women (N 19) aged 18 or over Marital status: Married 19 (100 %) Unmarried: 0 (0 %) Age: Below 30 = 8 (42.1 %) ; 30–39 = 9 (47.4 %); 40 and above = 2 (10.5 %)  Education level: Primary School 1 (5.3 %) High School 2 (10.5 %) Diploma 4 (21.1 %) Bachelor 9 (47.4 %) Master 2 (10.5 %)  Employment status: Employed = 7 (36.8 %) Unemployed = 12 (63.2 %)  Region: Aljouf = 6 (31.6 %) Riyadh = 4 (21.1 %) Jeddah = 3 (15.8 %) Hail = 1 (5.3 %) Alqassim = 1 (5.3 %) Khafji = 1 (5.3 %) Abha = 1 (5.3 %) Damam = 1 (5.3 %)  Parity: Nulliparous = 5 (26.3 %), Multiparous = 14 (73.7 %)  Pregnancy complications: Had complications = 12 (63.2 %); 1 (20 %) Hospital type: Public = 16 (84.2 %) 4 (80 %) Private = 3 (15.8 %) 1 (20 %) Medical decision*; Preterm labour 3, Indication of labour, 6, Birth mode 9, Epidural 4, Episiotomy 3  Medication use: 2, 1,  Pregnancy termination: 1, 1  Hysterectomy due to placenta accreta and adhesion 2, 2 | Pregnancy, birth, experienced miscarriage, or terminated a pregnancy in a Saudi hospital within the past 12 months. | 4 = Thick contextual description | 3 = Some data transformation and theoretical interpretation |
| Alsamman 2025; Barriers to postpartum health and opinions on a postpartum peer navigator program amongst refugee women resettled in California. Alsamman, S., Tadesse, R.T., Sarferaz, K. et al. BMC Pregnancy Childbirth 25, 372 (2025). https://doi.org/10.1186/s12884-025-07479-2 | **2025** | **California, USA** | This study explores the postpartum experiences of refugee women and assess their interest in and opinions on a postpartum peer navigator program. | Descriptive qualitative study; Data collection: semi-strcutured interviews Data analysis: (inductive) thematic analysis | **26** | The eligibility for participation included reproductive age females 18 years or older who resettled in the US as refugees, special immigrant visa holders, or asylum seekers. The average age of participants was 30 years (SD = 6.3) and the mean number of years resettled in the US across our sample was 4.5 years (SD = 3.0). With respect to primary language, 53.8% (n = 14) of participants spoke Arabic, 34.6% (n = 9) spoke Dari, and 11.5% (n = 3) spoke Pashto, and a majority of participants used an interpreter in healthcare settings (88.5%, n = 23). All participants were publicly insured. Most participants last delivered within two years of being interviewed (73.1%, n = 19). Only 15.4% (n = 4) of participants were first time mothers. A small number of participants experienced a pregnancy complication, such as diabetes or hypertension (30.8%, n = 8). | Eligibility: delivered a baby in the US within previous 5 years. Most participants birthed in US within previous 2 years (73.1% n=19) | 4 = Thick contextual description | 3 = Some data transformation and theoretical interpretation |
| [Andrén et al. Andrén, A; Akselsson, A; Rådestad, I; Ali, SB; Lindgren, H; Osman, HM; Erlandsson, K. Miscommunication influences how women act when fetal movements decrease an interview study with Swedish Somali migrant women. Midwifery. 2023;126. DOI: 10.1016/j.midw.2023.103796](https://dx.doi.org/10.1016/j.midw.2023.103796) | **2023** | Sweden | To explore how Swedish Somali migrant women perceive fetal movements, process information about fetal movements, and take actions if decreased fetal activity occurs | *Data collection: interviews Data Analysis:* content analysis | 15 | Swedish Somali migrant women 4 nulliparous and 11 multiparous women, who had given birth to 2-12 children each Aged 23 to 40 years; 5 women used interpreters for interviews | After 28/40 pregnant or <8 weeks postnatal | 3 = Mixture of thick and thin (sample characteristics but no cultural information) | 2 = Some interpretation |
| Appiah-Kubi 2024 African Immigrant Women's Experiences of Maternity Care in the United StatesAppiah-Kubi, Ruth MA, MPA; Kim, Yeong-Hyun PhD; Attanasio, Laura B. PhDAuthor InformationMCN, The American Journal of Maternal/Child Nursing 49(6):p 341-347, November/December 2024. | DOI: 10.1097/NMC.0000000000001043 | **2024** | Ohio, USA | This study extends the scope of inquiry to the maternity care experiences of African immigrant women from different African countries to offer a nuanced understanding of their care experiences at multiple levels. | Qualitative Descriptive Data collection: semi structured interviews Data analysis: reflexive thematic analysis | **15** | African immigrant women. Individuals were considered to be African immigrants if they were born in an African country and were currently residing in the United States, regardless of citizenship or residency status. Study participants were pregnant or had given birth within the last 5 years, were 18 years of age or older, were English-speaking, and had lived in the Columbus Metropolitan Area for 1 year or more. Country of originGhana 4; The Gambia 1; Cote d’Ivoire 1; Somalia 2; Nigeria 2; Kenya 2; Tanzania 1; Malawi 1; Uganda 1Length of stay in the United States≥5 years 10; <5 years 5Current pregnancy statusPregnant 2; Not pregnant 13Age of youngest childUnder 1 year old 5; 1–3 years old 4; 3–5 years old 6; | Birth within the last 5 years | 2 = Some context | 2 = Some interpretation |
| [Ayers et al. 2018 Ayers, BL; Purvis, RS; Bing, WI; Rubon-Chutaro, J; Hawley, NL; Delafield, R; Adams, IK; McElfish, PA. Structural and Socio-cultural Barriers to Prenatal Care in a US Marshallese Community. Maternal and child health journal. 2018;22(7):1067-1076. DOI: 10.1007/s10995-018-2490-5](https://dx.doi.org/10.1007/s10995-018-2490-5) | **2018** | USA | To examine Marshallese mothers’ beliefs, perceptions, and experiences of prenatal care and to identify potential barriers | *3 focus groups Data collection: focus groups Analysis*: thematic analysis | 43 | Marshallese community recruited through a collaboration with the Marshallese community and its organizations; Aged 20 – 62 (average 40 years old); Lived in US for average of 13 years; Mean number of pregnancies was 4.5 | Unknown | 3 = Mixture of thick and thin (sample characteristics but no cultural information) | 2 = Some interpretation |
| [Bains et al. 2021 (68,69) Bains, S; Skraning, S; Sundby, J; Vangen, S; Sorbye, IK; Lindskog, BV. Challenges and barriers to optimal maternity care for recently migrated women - a mixed-method study in Norway. BMC pregnancy and childbirth / 2021;21(1):686. DOI: 10.1186/s12884-021-04131-7](https://dx.doi.org/10.1186/s12884-021-04131-7) | **2021** | Norway | Identify challenges and barriers recently migrated women face in accessing and utilising maternity healthcare services | *Data collection: interviews Analysis:* thematic analysis | 10 | Pregnant women in Oslo, born in low/middle-income countries who migrated within last 5 years to Norway Region of origin: Sub-Saharan Africa (n=6), South Asia (n=5), North Africa & Middle East (n=5), Europe and Central Asia (n=2), Latin America and Caribbean (n=1), SE Asia & E Asia & Oceania (n=1) Mean age 30 years | Pregnant | 3 = Mixture of thick and thin (sample characteristics but no cultural information) | 3 = Some data transformation and theoretical interpretation |
| [Bawadi et al. 2020 (63) Bawadi H; Al-Hamdan, Z; Ahmad, MM. Needs of Migrant Arab Muslim Childbearing Women in the United Kingdom. Journal of Transcultural Nursing. 2020;31(6):591-597. DOI: 10.1177/1043659620921219](https://dx.doi.org/10.1177/1043659620921219) | **2020** | UK | Examine challenges faced by migrant Arab Muslim women in accessing maternity services to suggest ways to improve the childbirth experience | *Data collection: interviews (total 24). Analysis:* interpretative phenomenological framework | 8 | Women living in East Midlands, migrants to UK from Arab countries within last 10 years. Country of origin: Jordan (n=2), Saudi Arabia (n=2), Syria (n=1), Algeria (n=1), Sudan (n=1), Egypt (n=1) Aged 22-26 years | 4th trimester or <3 months postnatal | 4 = Thick contextual description | 3 = Some data transformation and theoretical interpretation |
| [Belton et al. 2018 Belton, S; Kruske, S; Jackson Pulver, L; Sherwood, J; Tune, K; Carapetis, J; Vaughan, G; Peek, M; McLintock, C; Sullivan, E. Rheumatic heart disease in pregnancy: How can health services adapt to the needs of Indigenous women? A qualitative study. Australian & New Zealand Journal of Obstetrics & Gynaecology. 2018;58(4):425-431. DOI: 10.1111/ajo.12744](https://dx.doi.org/10.1111/ajo.12744) | **2018** | Australia | To identify how health services could more effectively meet the needs of pregnant women with rheumatic heart disease | *Data collection: focus groups Analysis*: reports analysis using framework method | 8 | Aboriginal women Aged 22 - 37 years 2 women were pregnant with their first baby and the remainder had a second or subsequent pregnancy with one woman having her eighth baby | Pregnant | 4 = Thick contextual description | 3 = Some data transformation and theoretical interpretation |
| Benzaken 2025 Supporting infants and parents in the perinatal period (SIPP): Co-creating an improved journey. Tami Benzaken, Francesca Siracusa, Michelle D’Souza, Radhika Gulati, Esta Orchard, Alexandra Lemaigre, Clare Andrews, Mitch Blair, Published: May 12, 2025 https://doi.org/10.1371/journal.pone.0305786 | **2025** | **England, UK** | Primary aim. To understand what support is given to parents in hospital and the community in the first month after discharge from the postnatal ward and/ or neonatal unit. Secondary aim. To evaluate whether the support provided by the English NHS meets parents’ expressed needs and identify any other key support systems in the community. | Data collection: semi structured interviews and subsequent focus group Data analysis: thematic content analysis | **17** | First-time parents and caregivers of infants born in Northwick Park Hospital between 5th December 2021 and 30th September 2022. Participants were recruited using a combination of individual approach and highly visible posters and leaflets in the postnatal ward, special care baby unit, and the neonatal unit with links to expression of interest forms to participate in the research. The focus group was run by a paediatric doctor (TB) and an expert in patient and public participation (EO). Twelve parents (11 mothers, 1 father) attended the workshop. Most parents had experienced the maternity services at Northwick Park Hospital. Anonymity of data was preserved as the parents were not the same as those who participated in the initial interviews so anonymised quotes could be used without causing discomfort to any individuals in the group. | unknown | 4 = Thick contextual description | 2 = Some interpretation |
| Biggs 2025. Conversations about stillbirth prevention during pregnancy care from the perspectives of recent parents of refugee and migrant backgrounds, health professionals, and interpreters: A qualitative study. Laura J. Biggs https://orcid.org/0000-0002-8500-1584, Jane Yelland, Stephanie J. Brown ET AL https://doi.org/10.1177/17455057251365726 | **2025** | **Australia** | Understand how conversations about stillbirth prevention are experienced by parents of refugee and migrant backgrounds, interpreters, and healthcare professionals within public maternity services in Victoria and South Australia | Interpretative qualitative design Data collection: semi-structured interviews Data analysis: reflexive thematic analysis | **34** | Purposive sampling was used to recruit women and men who were aged 18 years or older; born in a low- or middle-income country and identified as belonging to the communities outlined in Table 1; and had a liveborn baby in the previous 12 months. Female 34 (72%) / Male 13 (28%) Number of children 1 = 11, 23%, 2–4 = 30, 64%, ⩾4 = 6, 13% Country or region of birth Afghanistan = 11, 23%; Burma = 8, 17%; Central Africa (region) = 4, 9%; East Africa (region) = 7, 15%; India = 2, 4%; Iran = 2, 4%; Iraq = 4, 9%; South Africa (region) = 1, 2%; Thailand = 7, 15%; West Africa (region) = 1, 2%; Languages spoken (other than English)b Arabic = 5, 11%; Assyrian = 3, 6%; Burmese = 1, 2%; Dari = 13, 28%; Dinka =1,2%, French = 2, 4%; Hindi = 2, 4%; Karen = 15, 32%; Kirundi= 6, 13%; Kinyarwanda = 2, 4%; Persian = 1, 2%; Swahili = 8, 17%; Other Bantu languagesc =2, 4%;  Years since arrival in Australia <1 = 1, 2%; 1–3 = 9, 19%; >3–6 = 10, 21%; >6–10 = 10, 21%; >10 = 17, 36%; | baby in previous 12 months | 3 = Mixture of thick and thin (sample characteristics but no cultural information) | 2 = Some interpretation |
| [Bitar and Oscarsson 2020 (67) Bitar, D; Oscarsson, M. Arabic-speaking women's experiences of communication at antenatal care in Sweden using a tablet application-Part of development and feasibility study. MIDWIFERY. 2020;84. DOI: 10.1016/j.midw.2020.102660](https://dx.doi.org/10.1016/j.midw.2020.102660) | **2020** | Sweden | Explore Arabic-speaking women’s experiences of communication at antenatal care in Sweden when using a tablet application | *Data collection: interviews Analysis:* content analysis | 10 | Arabic-speaking immigrant women Country of origin: Syria (n=7), Iraq (n=1), Lebanon (n=1), Morocco (n=1) Aged 20-38 year; 9 pregnant, 1 attending clinic for postpartum check-up | Pregnant or <12 weeks | 3 = Mixture of thick and thin (sample characteristics but no cultural information) | 4 = Extensive data transformation and theoretical interpretation |
| Boyvat 2025 Perspectives of Spanish-Speaking Families on RSV Immunoprophylaxis for Healthy Newborns Journal of Immigrant and Minority Health. Boyvat, S. F., Hinderstein, S., Aragona, E., Loyal. J. (2025) https://doi.org/10.1007/s10903-025-01742-6 | **2025** | **USA** | we chose to better understand the perceptions of parents who primarily speak Spanish on immunoprophylaxis administration for their newborn during the second respiratory season of its approval. | Data collection: semi-structured open-ended interviews Data analysis: Content analysis | 21 | 21 interviews of 17 mothers and four mother/ father pairs.; Participant Age (Years) <25 = 5 (20%) 25–30 = 4 (16%) 31–35 = 9 (36%) ≥ 36 = 7 (28%); Participant self reported ethnicity, Non-Hispanic = 3 (12%) Hispanic = 22 (88%); Country/region of origin: Colombia =1 (4%), Dominican Republic =3 (12%), Ecuador = 8 (32%), El Salvador =1 (4%), Guatemala =2 (8%), Mexico = 7 (28%), Peru = 1 (4%), Puerto Rico, 1 (4%), Other = 1 (4%) Insurance type Public = 24 (96%), None = 1 (4%) Highest level of education, Some high school = 14 (56%), College = 10 (40%), Graduate school = 1 (4%), Number of children, 1 = 11 (44%) 2 = 6 (24%), 3 = 5 (20%), 4 or more = 3 (12%) RSV vaccine received during pregnancya Yes 8 (38%), No, 12 (57%), Not sure, 1 (5%) Planning to give RSV immunoprophylaxis to newbornb, Yes = 17 (81%), No = 3 (14%) Delay to the PCP office 1 (5%) Parent planning to complete regular childhood vaccinations: Yes = 25 (100%) | Birth between Dec 2024 and March 2025 | 3 = Mixture of thick and thin (sample characteristics but no cultural information) | 2 = Some interpretation |
| Brown-Johnson 2025 Brown-Johnson CG, Kling SMR, Saliba-Gustafsson EA, et al. Hispanic Birthing Parents’ Experiences With Lactation Support Received In-Hospital: A Quality Improvement Needs Assessment. Journal of Human Lactation. 2025;41(2):207-219. doi:10.1177/08903344251321777 | **2025** | **California, USA** | To explore Hispanic birthing parents’ experiences with human milkfeeding and lactation support as part of a quality improvement needs assessment project, identifying barriers and facilitators during post-birth hospital recovery. | Data collection: three data sources for 37 interviews: (1) in-hospital observations that included opportunistic informal interviews, as well as telephone interviews with (2) English- and Spanish-language-preferring Hispanic birthing parents, and (3) pediatric clinician interviews (via snowball sampling recruitment). Data analysis: rapid and thematic analysis | **32** | Interviews conducted during in-hospital observation (n = 15); interviews conducted with English-language-preferring Hispanic birthing parents (n = 8); interviews conducted with Spanish-language-preferring Hispanic birthing parents (n = 9) and interviews with pediatric clinicians (n = 5). Telephone interviews were additionally conducted with eight English language-preferring Hispanic birthing participants (from an outreach to 39 participants) and nine Spanish-language preferring Hispanic birthing participants (from an outreach of 30 participants). Most participants interviewed on the telephone were in their 20s, delivered their baby vaginally, were publicly insured (16/17; 94%), and were born outside of the United States. Almost all participants interviewed on the telephone reported that they planned to breastfeed their infant. | observation and in-person interviews - on day of birth / telepone interviews 1-6 weeks post-birth | 4 = Thick contextual description | 4 = Extensive data transformation and theoretical interpretation |
| Cai et al. 2022 (74)* Cai D, Villanueva P, Stuijfzand S, Lu H, Zimmermann B, Horsch A. The pregnancy experiences and antenatal care services of Chinese migrants in Switzerland: a qualitative study. BMC Pregnancy Childbirth. 2022;22(1):1–12. | **2022** | Switzerland | Explore the pregnancy and antenatal care experiences of Chinese migrants in Switzerland, to identify their pregnancy outcomes and clarify their maternity care needs | *Data collection: interviews Analysis:* thematic analysis | 14 | Women who were born and grew up in China with Chinese nationality. Mean number of years lived in Switzerland 5 years; ranges 9 months-21 years. | Pregnant or <12 months | 4 = Thick contextual description | 4 = Extensive data transformation and theoretical interpretation |
| [Cai et al. 2024* Cai, DC; Villanueva, P; Lu, H; Zimmermann, B; Horsch, A.What matters to migrant women during labor and birth: Chinese mothers' experiences in Switzerland. BMC PREGNANCY AND CHILDBIRTH. 2024;24(1): DOI: 10.1186/s12884-024-06271-y](https://dx.doi.org/10.1186/s12884-024-06271-y) | **2024** | Switzerland | To examine the childbirth experiences of Chinese migrant mothers and their family members and to identify their intrapartum care needs | *Data collection: interviews Analysis:*  thematic analysis | 14 | Chinese mothers who had given birth in Swiss hospitals All interviews used their native language - Standard Mandarin Chinese Aged 34 on average; Lived in Switzerland for 1-21 years | <1 year | 4 = Thick contextual description | 2 = Some interpretation |
| [Carlsson et al. 2016 Carlsson, T; Marttala, UM; Mattsson, E; Ringner, A. Experiences and preferences of care among Swedish immigrants following a prenatal diagnosis of congenital heart defect in the fetus: a qualitative interview study. BMC pregnancy and childbirth. 2016;16(1):130. DOI: 10.1186/s12884-016-0912-1](https://dx.doi.org/10.1186/s12884-016-0912-1) | **2016** | Sweden | To explore experiences and preferences of care following a prenatal diagnosis of congenital heart defect among Swedish immigrants | *Data collection: interviews Analysis*:content analysis | 5 | Immigrants with a fetus diagnosed with a major congenital heart defect i.e. in need of corrective surgery within one year after birth 4 were interviewed with their partner present | Pregnant | 4 = Thick contextual description | 3 = Some data transformation and theoretical interpretation |
| [Ceulemans et al. 2020 (66) Ceulemans, M; Chaar, R; Van Calsteren, K; Allegaert, K; Foulon, V. Arabic-speaking pregnant women with a migration background: A vulnerable target group for prenatal counseling on medicines. Research in Social & Administrative Pharmacy. 2020;16(3):377-382. DOI: 10.1016/j.sapharm.2019.06.004](https://dx.doi.org/10.1016/j.sapharm.2019.06.004) | **2020** | Belgium | To explore the experiences of Arabic-speaking pregnant women with a migration background living in Belgium, regarding their communication with HCPs, and perceptions towards HCPs and the use of healthcare products during pregnancy | *Data collection: interviews Analysis:* qualitative analysis using Guide of Leuven | 17 | Arabic-speaking women, with low Dutch / French / English proficiency Country of origin: Syria (n=10), Palestine (n=3), other (n=4) Lived in Belgium for at least 3 months Aged 18-35 years | Pregnant | 4 = Thick contextual description | 2 = Some interpretation |
| [Chu et al. 2017 Chu, MS.; Park, M.; Kim, JA. First childbirth experience of international marriage migrant women in South Korea. Women and Birth. 2017;30(4):e198-e206. DOI: 10.1016/j.wombi.2017.01.001](https://dx.doi.org/10.1016/j.wombi.2017.01.001) | **2017** | South Korea | Describe the meaning of the first childbirth experiences of international marriage migrant women marrying Korean men in South Korea | *Data collection: face-to-face open-ended interviews Analysis*: Colaizzi’s data analysis method using a descriptive phenomenology approach | 10 | Foreign nulliparous women who migrated to marry Korean men, could speak Korean and experienced first childbirth in Korea Country of origin: 3 China, 3 Philippines, 3 Vietnam, and 1 Cambodia Aged 25-43 years old | 1–10 years | 3 = Mixture of thick and thin (sample characteristics but no cultural information) | 3 = Some data transformation and theoretical interpretation |
| Claerbout 2024 Claerbout A, Steppe J, Joni G, van kelst L. Challenges and facilitators to perinatal mental healthcare among first-generation migrant women: A qualitative ethnographic study in Flanders, Belgium. European Journal of Midwifery. 2024;8(December):1–10. doi:10.18332/ejm/194682. | **2024** | **Belgium** | To explore the needs, barriers and facilitators regarding perinatal mental health support in women with a first-generation migration background and how they experience support within their own community. | **Data collection:** qualitative in-depth face-to-face interviews Data analysis: qualitative inductive content analysis and constant comparison of audio files | **11** | In total, 11 mothers were interviewed. Most of the interviews were conducted with the assistance of an interpreter in the participant’s native language. The majority of all participants indicated that war in their home country motivated them to migrate to Belgium between 2 to 5 years before the interview. Characteristics n (%)Interpreter involved: 9 (82)Reason for immigration: Family reunification = 4 (36), Studies = 1 (9), War = 6 (55)Country of birth: Morocco = 3 (27), Palestine = 1 (9), Syria = 2 (18), Kosovo = 1 (9), Cameroon = 1 (9), Iraq = 1 (9), Paraguay = 1 (9), Russia = 1 (9)Residency in Belgium: <12 months = 1 (9), 12–23 months = 1 (9), 2–5 years = 4 (36), >5 years = 3 (27), Not specified* = 2 (18)Age, median (range) : 21 (28–38)Mode of delivery: Vaginal = 9 (82), Cesarean section = 2 (18)Family status: Single = 1 (9), Has a partner = 10 (91)Education level: Secondary school not completed = 5 (54), Secondary school completed = 3 (27), Higher education started = 3 (27) | 7 weeks post-partum onwards | 4 = Thick contextual description | 3 = Some data transformation and theoretical interpretation |
| Claisse 2024; Caroline Claisse, Abigail C. Durrant, and Mabel Lie. 2024. Understanding Antenatal Care Needs through Co-Creation with Roma Women to Inform the Design of mHealth Technologies. In Proceedings of the CHI Conference on Human Factors in Computing Systems (CHI ’24), May 11–16, 2024, Honolulu, HI, USA. ACM, New York, NY, USA, 16 pages. https://doi.org/10.1145/ 3613904.3642584 | **2024** | **England, UK** | To explore women’s needs, experiences of healthcare services and cultural beliefs about pregnancy and childbirth. To explore available resources and tools including examples of pregnancy apps to assess the potential of mHealth and inform future work for supporting antenatal care provision in the Roma community | Data collection: eight Co-creation Workshops. Co-creation was scaffolded by design-based methods [58]; Data collection lasted over four months: it started with the first workshop on 25th January 2023 and concluded with the debriefing session on 3rd May 2023; a pregnancy map was collectively created to visually represent and understand key moments in the pregnancy. Data analysis: thematic analysis | **11** | Roma; 11 women. Ages: 2 = 55-64; 2 = 45-54, 5 = 35-44; 2 = 25-34. No of children, 1 (4), 2, (1), 3 (3), 4 (2); 5 (0), 6 (1); Years in the UK: <5 (1), 5-10 (0), 10-15 (2), 15-20 (3), >20 (4); UK pregnancy: 0 (3), 1 (6), 2 (0), 3 (0), 4 (1), ,5 (0), 6 (0) | 4 months to 33 years | 4 = Thick contextual description | 3 = Some data transformation and theoretical interpretation |
| Darivemula 2024 Postpartum menstrual equity: Video and audio analysis of vaginal bleeding counseling during postpartum inpatient care at a southeastern US tertiary hospital Shilpa M Darivemula1, Kelley EC Massengale2,3,4 , Catalina Montiel5 , Alison M Stuebe6,7,8 and Kristin P Tully6, | **2024** | **USA** | To evaluate the patterns and content of vaginal bleeding counseling provided to birthing parents while ona postnatal inpatient unit. | Data collection: video observation - of inpatient postpartum care. Data analysis: thematic coding of video and audio data analysis evaluating patterns of vaginal bleeding counseling timing, content, and language concordance and thematic content of this communication. | **16** | 16 birthing parents consented to participate. Inclusion criteria included: age over 18 years old, fluency in English or Spanish, recruitment between 6 and 24 h postpartum, a liveborn singleton who was rooming-in, andaccess to a phone or computer. Fifteen families were filmed (one was not filmed due to a technical error with the recording equipment). All participating families included a filmed companion. Six birthing parents self-identified as Hispanic white and Spanish-speaking, five identified as non-Hispanic Black, three identified as non-Hispanic white, and one identified as non-Hispanic multi-race. Birthing parent ethnicity and race: Hispanic White 6 (40); Non-Hispanic Black 5 (33); Non-Hispanic White 3 (20); Non-Hispanic multi-race 1 (7); Birthing parent preferred language: English 9 (60); Spanish 6 (40); Birthing parent age: 18–24 years old 2 (13); 25–34 years old 9 (60); 35 years or older 4 (27) Parity: Primiparas 7 (47); Multiparous 8 (53)Infant’s gestational age at delivery: 34 + 0 to 36 + 6 weeks 2 (13); 37 + 0 to 39 + 6 weeks 10 (67); 40 weeks or more 3 (20)Type of birth: Cesarean section 8 (53); Vaginal 7 (47); Dyad length of stay in postpartum unit: 24 h or less 1 (7); 25–48 h 3 (20); 49–72 h 10 (67)73 h or more 1 (7)Method of infant feeding in postpartum unit: Human milk and formula 8 (53); Human milk 6 (40); Formula 1 (7) | 6-24h postpartum and prior to postnatal discharge | 4 = Thick contextual description | 3 = Some data transformation and theoretical interpretation |
| [Doering et al. 2015 Doering, K; Patterson, J; Griffiths, C. Experience of the New Zealand maternity care system by a group of Japanese women in one centre. New Zealand College of Midwives Journal. 2015;(51):5-10. DOI: 10.12784/nzcomjnl51.2015.1.5-10](https://dx.doi.org/10.12784/nzcomjnl51.2015.1.5-10) | **2015** | New Zealand | to explore how some Japanese women experienced pregnancy, labour and birth care in New Zealand | *Data collection: interviews and focus groups. Analysis*:Thematic analysis usingSandelowski’s qualitative description methodology | 13 | Japanese women: 9 interviews and 1 focus group with 4 women Aged 32-42 years (average 37 years) 2-19 years in NZ (average 10 years) | <3 years | 3 = Mixture of thick and thin (sample characteristics but no cultural information) | 2 = Some interpretation |
| [Dube et al. 2024 Dube, M; Ireland, S; Bromley, A; Steel, M; Gao, Y; Kildea, S. " It ' s all about cultural understanding ": A reflexive thematic analysis of women ' s experiences at a dedicated refugee midwifery group practice service. WOMEN AND BIRTH. 2024;37(2):410-418. DOI: 10.1016/j.wombi.2023.12.006](https://dx.doi.org/10.1016/j.wombi.2023.12.006) | **2015** | Australia | To explore and describe women’s experiences and perceptions of care from a dedicated Refugee Midwifery Group Practice service | *Data collection: focus groups Analysis:* reflexive thematic analysis | 16 | Women who had received care from a Refugee Midwifery Group Practice 3 focus groups with women born in 6 different countries, in three language groups: Sudanese Arabic, Somali, and English; Aged 20 to over 35 years old | 5 weeks to 6 months postnatal | 3 = Mixture of thick and thin (sample characteristics but no cultural information) | 3 = Some data transformation and theoretical interpretation |
| Dullat 2025 Understanding a Minority Group's (Roma) Experiences of Access and Quality in Maternity Services Jaspreet Kaur Dullat, Thérèse McDonnell, Louise Hendrick, Léan McMahon, Gemma Moore, Emily Murphy, Carmen Nae, Danut Nae, Marianna Prontera, Eilish McAuliffe First published: 18 August 2025 https://doi.org/10.1111/hex.70389 | **2025** | **Ireland** | to identifybarriers to accessing care faced by this minority community and understand their experiences of maternity services to enhanceequity, accessibility and cultural responsiveness in maternal healthcare. | Data collection: online workshops and questionnaire. Workshops incorporated information components, focus groups and Romani translation and interpretation to ensure accessibility.Data analysis: inductive thematic analysis | **8** | Eight Roma women participated in focus groups to explore their experiences with maternity and neonatal services in Ireland (Table 2). Participants ranged in age from 21 to 39 years. The number of children per participant varied, with five women having more than five children. Three women were pregnant at the time of the study, and all had at least three children born in Ireland. Seven women reported becoming pregnant before the age of 18 years, and five women had experienced homelessness after the birth of their first child in Ireland.Five participants had lived in Ireland for more than 5 years. | <2 years to > 18 years | 4 = Thick contextual description | 3 = Some data transformation and theoretical interpretation |
| Engelhardt 2025 Exclusion and Othering in maternity care for forced migrant women: a qualitative study with forced migrant mothers and health care professionals in Germany. SSM - Qualitative Research in Health https://doi.org/10.1016/j.ssmqr.2025.100614 | **2025** | **Germany** | to (i) identify contextual factors of exclusion that shape motherhood and maternity care for forced migrant mothers; to (ii.) interpret the results through the lens of Othering as a theoretical framework and to (iii.) explore regional differences in infrastructure, access to care and lived experiences of exclusion in Berlin, Brandenburg and NRW | Problem centred interviews. Data collection: semi-structured questionnaire Data analysis: framework method | **33** | 33 forced migrant mothers who recently gave birth as well as 80 maternal HCPs (gynaecologists, midwives, and social workers), eight major factors of exclusion were identified during pregnancy, childbirth, and up to 11 months postpartum. A total of 33 forced migrant mothers (M-age =31.0 years, range =24–39 years) who had recently given birth to a child (Mage =5.3 months, range =1–11 months) participated in a qualitative interview. All women had given birth in a public hospital (17 vaginal births, 16 caesarean sections). Most women (n =26) had previously given birth (second time =11, third time =6, fourth time =4, fifth time =3, sixth time =2). Eighteen participants had previously given birth in Germany while fifteen of them had given birth in Germany for the first time and seven for the first time in their lives. Five mothers were single parents, nine mothers had primary responsibility for parenting and 19 mothers shared responsibility of parenting with the father. Five transnational mothers who had to leave at least one older child in their country of origin. Interviewed mothers were forced to migrate to Germany from 19 different countries, most frequently from Syria, Afghanistan, Cameroon, Eritrea, and Nigeria. They showed a high level of linguistic diversity and heterogenous ethnic and religious minority backgrounds (e.g., Roma, Yazidi, Muslim). Mothers had lived in Germany for an average of three years. Only one woman held a permanent residency status, and 16 mothers held a secure recognition as refugee. The remaining 16 women were living in permanent temporariness. Five mothers had never had the possibility of going to school, while four mothers held a university degree from their country of origin. Mothers lived in three regions of Germany | 1-11 months post-partum | 4 = Thick contextual description | 2 = Some interpretation |
| [Evans et al. 2022 Evans, M; Plows, J; McCarthy, R; McConville, B; Haith-Cooper, M. What refugee women want from maternity care: a qualitative study. British Journal of Midwifery. 2022;30(9):502-511. DOI: 10.12968/bjom.2022.30.9.502](https://dx.doi.org/10.12968/bjom.2022.30.9.502) | **2022** | England, UK | To ask what refugee women require from maternity care, to understand how to tailor services, to ensure they are acceptable to refugee women and therefore improve their maternity care experience | *Data collection: focus groups Analysis:* thematic analysis | 10 | All women included in the focus groups had experienced more than one pregnancy (range 1-5) 3 women came from sub-Saharan Africa, 3 from Sudan, 1 from India, 1 from south Asia and 1 from Bolivia. 4 were asylum seekers, 2 were refugees and 3 women originally came on a spouse visa and subsequently claimed asylum. 6 women used an interpreter | Unknown | 4 = Thick contextual description | 4 = Extensive data transformation and theoretical interpretation |
| Fair 2025 Frankie Fair, Amy Furness, Gina Higginbottom, Sam Oddie & Hora Soltani(2025) Parent’s experiences of the impact of ethnicity and skin pigmentation on perinatal care.,Ethnicity & Health, 30:5, 581-601, DOI: 10.1080/13557858.2025.2488893 | **2025** | **UK** | to explore the perceived impact of ethnicity and race on perinatal care among parents from diverse ethnic minority backgrounds or who had a Black, Asian, or ethnic minority child born in the UK within the last five years to better understand areas of ethnic inequality within perinatal care | Focused ethnography Data collection: semi-structured interviews Data analysis: thematic analysis | **20** | 24 parents participated in interviews, with each interview lasting around 30 min [range 16–55 min]. Basic demographic details are outlined in Table 1. The interviewees comprised 20 mothers and 4 fathers, with one of the mothers interviewed as the carer of a relative’s child who was under 5. Parents’ ages ranged from 25 to 41 years, and the age of their youngest children ranged from 8 weeks to 5 years. Participants were recruited from across the United Kingdom. In terms of racial background, 15 participants identified as Black (Black African, Black Caribbean, and other Black backgrounds), three participants as Asian (including Indian background and other Asian background). Three participants identified as mixed race, with two identifying as Black Caribbean and White British, and one identifying as African-Asian. Two participants belonged to other ethnic groups, both of middle Eastern descent. One mother identified as White but had a child of mixed race. | 8 weeks to 5 years | 3 = Mixture of thick and thin (sample characteristics but no cultural information) | 2 = Some interpretation |
| [Filby et al. 2020 (64) Filby, A; Robertson, W; Afonso, E. A service evaluation of a specialist migrant maternity service from the user's perspective. British Journal of Midwifery. 2020;28(9):652-659. DOI: 10.12968/bjom.2020.28.9.652](https://dx.doi.org/10.12968/bjom.2020.28.9.652) | **2020** | England, UK | To evaluate the specialist migrant maternity service provided by Kings College Hospital London, based upon users’ experience and satisfaction | *Data collection: interviews Analysis:* inductive thematic analysis | 10 | Women who had used the specialist migrant maternity service in the previous three months Country of origin: Vietnam, China, Albania, Nigeria, Afghanistan, Yemen Aged 23-37 years | Pregnant or <3 months | 3 = Mixture of thick and thin (sample characteristics but no cultural information) | 3 = Some data transformation and theoretical interpretation |
| [Fitzgerald et al. 2016 Fitzgerald, EM; Cronin, SN; Boccella, SH. Anguish, Yearning, and Identity. Journal of Transcultural Nursing. 2016;27(5):464-470, DOI: 10.1177/1043659615578718](https://dx.doi.org/10.1177/1043659615578718) | **2016** | UK | To seek a better understanding of needs and access issues among pregnant, low-income Hispanic women | *Data collection: focus groups Analysis*:content analysis using guidelines by Colaizzi with a phenomenological approach | 8 | Spanish-speaking women attending a community prenatal education fair 2 FGs with 2-8 in each the second one 6 months after the first | Unknown | 2 = Some context | 1 = No or minimal data transformation and interpretation |
| Furness 2025 Exploring research and healthcare priorities in maternal health: A qualitative ethnographic study with mothers from ethnic minority backgrounds in the UK; Amy Furness 1, Alison Salmon 1, Frankie Fair 1, Hora Soltani 1 Eur J Midwifery 2025;9 (September): 42 DOI: https://doi.org/10.18332/ejm/209195 | **2025** | UK | To explore priority areas for research regarding Black, Asian, and ethnic minority mothers accessing healthcare in the UK | Study design: Qualitative ethnographic study; Data collection: focus groups Data analysis: inductive thematic analysis | 55 | Sample size: n=55; Year: 2024; Setting: Community-based focus groups with mothers from ethnic minority backgrounds in South Yorkshire. 55 women from diverse ethnic backgrounds, with the largest groups identifying as Black African, Arab and Pakistani (Figure 1). Participants spanned various age groups (range: 20–49 years) (Supplementary file Figure 1). Thirty-five women were born outside the UK, and 15 participants had lived in the UK for 10 or more years (Figure 2). English was the first language for only 9 participants, with Arabic being the most common nonEnglish language (Figure 3). Most participants had multiple children, with 19 having three children and only one currently pregnant | **unknown** | 3 = Mixture of thick and thin (sample characteristics but no cultural information) | 4 = Extensive data transformation and theoretical interpretation |
| [Gallimore et al. 2021 Gallimore, A; Irshad, T; Cooper, M; Cameron, S. Influence of culture, religion and experience on the decision of Pakistani women in Lothian, Scotland to use postnatal contraception: a qualitative study. BMJ sexual & reproductive health / 2021;47(1):43-48. DOI: 10.1136/bmjsrh-2019-200497](https://dx.doi.org/10.1136/bmjsrh-2019-200497) | **2021** | Scotland, UK | To identify experience and decision-making around postnatal contraceptive provision for Pakistani women in Lothian | *Data collection: focus groups and interviews Analysis:* thematic analysis using a phenomenological approach | 23 | First- and second-generation Pakistani women 3 FGs (n=15), interviews (n=8) including some with interpreters | Pregnant and/or <5 years | 3 = Mixture of thick and thin (sample characteristics but no cultural information) | 3 = Some data transformation and theoretical interpretation |
| Garnweidner-Holme et al. 2017 Garnweidner-Holme, LM; Lukasse, M; Solheim, M; Henriksen, L. Talking about intimate partner violence in multi-cultural antenatal care: a qualitative study of pregnant women's advice for better communication in South-East Norway. BMC pregnancy and childbirth. 2017;17(1):123. DOI: 10.1186/s12884-017-1308-6 | **2017** | Norway | To explore how women from different ethnic backgrounds experienced Intimate partner violence (IPV) and what their recommendations were about how midwives should communicate about IPV in antenatal care | *Data collection: interviews Analysis*: thematic analysis | 8 | Had experienced IPV during pregnancy and currently or previously stayed in a crisis shelter Women with immigrant backgrounds (n = 5) and ethnic Norwegians (n = 3) Country of birth Iraq, Turkey, Pakistan, Poland, Spain Number of children 1-3 1 Interview conducted via interpreter | <16 years | 4 = Thick contextual description | 2 = Some interpretation |
| [Gewalt et al. 2018 Gewalt SC, Berger S, Ziegler S, Szecsenyi J, Bozorgmehr K (2018) Psychosocial health of asylum seeking women living in state-provided accommodation in Germany during pregnancy and early motherhood: A case study exploring the role of social determinants of health. PLoS ONE. 13(12): e0208007. https://doi.org/10.1371/journal. pone.0208007](https://doi.org/10.1371/journal.%20pone.0208007) | **2018** | Germany | To investigate asylum seeking women’s experiences and perceived needs during pregnancy and early motherhood whilst living in state-provided accommodation in one federal state in Southern Germany, with a particular focus on psychosocial factors | *Data collection: interviews Analysis*: content and thematic analysis using WHO Conceptual Framework for Action on the Social Determinants of Health | 9 | Asylum seekers in first or second pregnancy trimester with potential for a second interview during pregnancy at least 4 weeks later and third interview in postnatal period 21 interviews in total although 5 had 2 and 1 women only had 1 interview Same interviewer and interpreter, where needed, was used across all interviews with each woman Aged 22-37 years old Participants had arrived in Germany 1-6 months prior to first interview and were transferred up to 4 times | In pregnancy and up to six-week postnatal assessment | 2 = Some context | 1 = No or minimal data transformation and interpretation |
| [Granada et al. 2022 (77) Granada, S; Quinteros Baumgart, C; Rupley, D. Birthing Experiences of Spanish Speakers During the COVID-19 Pandemic in NYC. Journal of Immigrant & Minority Health. 24, 1013–1019 (2022). https://doi.org/10.1007/s10903-022-01331-x](https://doi.org/10.1007/s10903-022-01331-x) | **2022** | USA | To describe birth experience during COVID-19 among monolingual Spanish and bilingual Spanish/ English speakers | *Data collection: interviews Analysis:* unclear, data coded and ‘organized into common themes’ | 30 | 15 monolingual Spanish-speakers, all born outside USA, 15 bilingual Spanish & English Region of origin: USA (n=11), Latin America (n=19) Race: White (n=4), Black (n=3), Native American (n=1), Other (n=23) Average years in USA: 21 for bilingual, 8 for monolingual Average age 30 years | 4-5 months postnatal | 4 = Thick contextual description | 2 = Some interpretation |
| [Guo et al. 2018 Guo, Y; Hildebrand, J; Rousseau, J; Brown, B; Pimentel, P; Olshansky, E. Underserved pregnant and postpartum women's access and use of their health records. MCN: The American Journal of Maternal/Child Nursing. 2018;43(3):164-170. DOI: 10.1097/NMC.0000000000000432](https://doi.org/10.1097/nmc.0000000000000432) | **2018** | USA | To examine knowledge of and experiences with use of their electronic health record (EHR) among mostly Hispanic women during pregnancy and postpartum | *Data collection: focus groups Analysis*: reports content analysis | 26 | Women who were in the MOMS Orange County prenatal or postpartum home visitation program and completed surveys and participated in focus groups Survey and 3 focus groups (one English and 2 Spanish) Mean age 33 years | Pregnant or in unspecified postnatal period | 4 = Thick contextual description | 3 = Some data transformation and theoretical interpretation |
| Guðmundsdóttir 2025 Sexual & Reproductive Healthcare, Volume 44, June 2025, 101087, Sexual & Reproductive Healthcare. Fostering empowerment through communication: The needs, expectations, and experience of maternity care among polish migrant women in Iceland. Embla Ýr Guðmundsdóttir, Marianne Nieuwenhuijze, Annadís Greta Rúdólfsdóttir, Helga Gottfreðsdóttir. https://doi.org/10.1016/j.srhc.2025.101087 | **2025** | Iceland | To explore the needs, expectations, and experiences of Polish migrantwomen regarding midwifery care during childbirth in Iceland | Data collection: semi-structured interviews at 2 time points Data analysis: reflexive thematic analysis | 8 | eight women completed the study, participating in a total of 16 interviews—eight during pregnancy (T1) and eight postpartum (T2). Interviews lasted between 48 and 138 min, with an average duration of 87 min. The timing and location of interviews were determined by the participants, with five conducted via Zoom and eleven in person. Participants had resided in Iceland for one to five years, with ages ranging from 24 to 35 years. Five participants were married and three were in relationships, all with Polish partners. Most lived in the capital area, with all but one being either employed or studying. | 4-7 weeks (5); 8-11 weeks (3) | 4 = Thick contextual description | 4 = Extensive data transformation and theoretical interpretation |
| [Hatherall et al. 2016 Hatherall, B; Morris, J; Jamal, F; Sweeney, L; Wiggins, M; Kaur, I; Renton, A; Harden, A. Timing of the initiation of antenatal care: An exploratory qualitative study of women and service providers in East London. Midwifery. 2016;36:1-7. DOI: 10.1016/j.midw.2016.02.017](https://dx.doi.org/10.1016/j.midw.2016.02.017) | **2016** | UK | To explore the factors which influence the timing of the initiation of a package of publically funded antenatal care for pregnant women living in a diverse urban setting | *Data collection: interviews Analysis*:Thematic analysis | 21 | Pregnant and postnatal women of whom 16 were born outside the UK in 13 different countries. All had 1-2 children | Pregnant and women who had ‘recently given birth’ (unknown) | 3 = Mixture of thick and thin (sample characteristics but no cultural information) | 2 = Some interpretation |
| [Henrique et al. 2023 Henrique, AJ; Rodney, P; Hall, W; Thorne, S; Joolaee, S. Women's autonomy for managing labour pain in a relational context: An interpretive description study. JOURNAL OF CLINICAL NURSING. 2023;32(19-20):7390-7401. DOI: 10.1111/jocn.16780](https://dx.doi.org/10.1111/jocn.16780) | **2023** | Canada | To describe how women perceived relational autonomy for decision-making during childbirth pain and illuminate influencing factors | *Data collection: telephone interviews Analysis*: thematic analysis | 10 | Women who (1) speaking and reading English; (2) full-term delivery; (3) live and healthy newborn; (4) minimum age of 19 years; (5) a minimum of six visits to prenatal care; and (6) reported pain during childbirth Aged 30-40 years old 55.6% first-time mothers 66.7% delivered vaginally 55.6% reported English was not their primary language | <1 month | 4 = Thick contextual description | 2 = Some interpretation |
| [Henry et al. 2020 (60) Henry, J; Beruf, C; Fischer, T. Access to Health Care for Pregnant Arabic-Speaking Refugee Women and Mothers in Germany. Qualitative health research. 2020;30(3):437-447. DOI: 10.1177/1049732319873620](https://dx.doi.org/10.1177/1049732319873620) | **2020** | Germany | To investigate how premigration experiences, conceptions about pregnancy and childbirth, health literacy and language skills influence access to health care, experiences of healthcare and childbirth | *Data collection: interviews Analysis:* Content analysis using Levesque’s access model as a framework with Phenomenological design | 12 | Refugee women who had received antenatal care or given birth in Germany Country of origin: Iraq (n=2), Syria (n=9), Palestine (n=1) Lived in Germany between 4 months & 3 years Aged 19-38 years 8 pregnant, 6 postnatal | Pregnant or <3 years | 3 = Mixture of thick and thin (sample characteristics but no cultural information) | 2 = Some interpretation |
| [Higginbottom et al. 2015* Higginbottom, GMA; Safipour, J; Yohani, S; O'Brien, B; Mumtaz, Z; Paton, P. An ethnographic study of communication challenges in maternity care for immigrant women in rural Alberta. MIDWIFERY. 2015;31(2):297-304. DOI: 10.1016/j.midw.2014.09.009](https://dx.doi.org/10.1016/j.midw.2014.09.009) | **2015** | Canada | To identify the nature of communication difficulties in maternity services as perceived by cohorts of immigrant women, health care providers and social service providers | *Data collection: interviews Analysis*:analysed using principles expounded by Roper and Shapira for the analysis of ethnographic data | 31 | Immigrant women who were using or had recent experience with maternity services Country of birth included Mauritania, Pakistan, Philippines, Congo, Eritrea Aged from 28-40 years Length of residence 1-6 years | <2 years | 4 = Thick contextual description | 4 = Extensive data transformation and theoretical interpretation |
| [Higginbottom et al. 2016* Higginbottom, GM; Safipour, J; Yohani, S; O’Brien, B; Mumtaz, Z; Paton, P; Chiu, Y; Barolia, R. An ethnographic investigation of the maternity healthcare experience of immigrants in rural and urban Alberta, Canada. BMC Pregnancy and Childbirth. 2016;16:20 DOI: 10.1186/s12884-015-0773-z](https://doi.org/10.1186/s12884-015-0773-z) | **2016** | Canada | To (1) generate new understanding of the processes that perpetuate immigrant disadvantages in maternity healthcare, and (2) devise potential interventions that might improve maternity experiences and outcomes for immigrant women in Canada. | *Data collection: interviews and focus groups Analysis*:data analysis contextualized within theories of organizational behaviour and critical realism with ethnography | 34 | Immigrant women from Sudan (n=12), the Philippines (n=8), China (n=6), Columbia (n=2), and one each from Tajikistan, India, Mauritania, Pakistan, and Eritrea and with current or recent experience of using maternity services Data were collected over 2.5 years Interpreters were used for some interviews Average age was 35.5 years | < 2 years | 4 = Thick contextual description | 4 = Extensive data transformation and theoretical interpretation |
| [Iturralde et al. 2021 Iturralde, Esti; Hsiao, Crystal A.; Nkemere, Linda; Kubo, Ai; Sterling, Stacy A.; Flanagan, Tracy; Avalos, Lyndsay A. Engagement in perinatal depression treatment: a qualitative study of barriers across and within racial/ethnic groups. BMC Pregnancy & Childbirth. 2021;21(1):1-11. DOI: 10.1186/s12884-021-03969-1](https://dx.doi.org/10.1186/s12884-021-03969-1) | **2021** | USA | To better understand previously observed racial/ethnic disparities in perinatal depression treatment rates | *Data collection: focus groups Analysis: ‘*general inductive approach’ using Capability-Opportunity-Motivation-Behavior theoretical framework | 30 | Asian, Black, Latina, and White race/ethnicity with positive depression screens Mean age 34 years | Pregnant or <12 months | 4 = Thick contextual description | 4 = Extensive data transformation and theoretical interpretation |
| Johansson 2025 Migrant women with cultural doula support during pregnancy and after childbirth as a complement to midwifery care in Sweden – An interview study.Midwifery Volume 146, July 2025, 104420; Margareta Johansson, Elenor Kaminsky, Ingrid Ström, Helena Volgsten DOI: 10.1016/j.midw.2025.104420 | **2025** | Sweden | To explore migrant women's experiences of cultural doula support during pregnancy and after childbirth as a complement to midwifery care. | *Qualitative exploratory study design Data collection:* semi-strcutured interviews *Data analysis:* inductive reflexive thematic analysis | 21 | A total of 21 migrant women from non-European countries in Sweden were interviewed via female language interpreters. Age (years) between 22 and 40, on average 29 Lived in Sweden between 1 and 7 years, on average 2 years Country of origin: Bangladesh = 1; Eritrea = 7, Ghana = 1, Iran = 1, Morocco = 3, Palestine = 3, Syria = 5 Level of education: Illiterate = 1, Elementary school = 6, High school = 6, University = 8 Parity: Primiparity = 14, Multiparity = 7 | Pregnant migrant women who had received cul tural doula support during 2021 and 2022 | 3 = Mixture of thick and thin (sample characteristics but no cultural information) | 2 = Some interpretation |
| [John et al. 2021 (72) John JR; Curry G; Cunningham-Burley S. Exploring ethnic minority women's experiences of maternity care during the SARS-CoV-2 pandemic: A qualitative study. BMJ Open. 2021;11(9):e050666. DOI: 10.1136/bmjopen-2021-050666](https://dx.doi.org/10.1136/bmjopen-2021-050666) | **2021** | Scotland, UK | Explore the experiences of pregnancy, childbirth, antenatal and postnatal care in women belonging to ethnic minorities and to identify any specific challenges that these women faced during the SARS-CoV-2 pandemic | *Data collection: telephone interviews. Analysis:* thematic analysis. | 16 | Women from a Black, Asian and minority ethnic background Ethnicity: Black African (n=7), Black Caribbean (n=1), Indian (n=3), Chinese (n=1), Bangladeshi (n=1), Pakistani (n=1), Arab (n=2). 15 born outside UK. 9 antenatal, 7 postnatal | Pregnant or <6 months | 4 = Thick contextual description | 3 = Some data transformation and theoretical interpretation |
| [Johnsen et al. 2020 (61) Johnsen, H; Christensen, U; Juhl, M; Villadsen, SF. Organisational barriers to implementing the MAMAACT intervention to improve maternity care for non-Western immigrant women: A qualitative evaluation. International Journal of Nursing Studies. 2020;111:103742. DOI: 10.1016/j.ijnurstu.2020.103742](https://dx.doi.org/10.1016/j.ijnurstu.2020.103742) | **2020** | Denmark | Explore the main organisation barriers, which impacted the intended mechanisms of the MAMAACT intervention in Danish antenatal care | *Data collection: interviews. Analysis:* systematic text condensation & candidacy framework. | 21 | Non-Western immigrant women from: Iraq, Jordan, Morocco, Nepal, Pakistan, Turkey, Somalia, Syria and Yemen Average age 32 years 6 expecting first child, 15 expecting second child or more | Pregnant | 3 = Mixture of thick and thin (sample characteristics but no cultural information) | 3 = Some data transformation and theoretical interpretation |
| [Kirkendall and Dutt 2023 Kirkendall, A; Dutt, A. Refugee women's pregnancy and childbirth experiences in the US: Examining context through a reproductive justice framework. Feminism & Psychology 11// 2023;33(4):529-549. DOI: 10.1177/09593535221149166](https://dx.doi.org/10.1177/09593535221149166) | **2020** | USA | To provide insight into what changes are needed for more just, meaningful, and satisfactory healthcare realities for diverse refugee women | *Data collection: focus groups Analysis:*  thematic analysis informed with structural intersectional approach to reproductive justice framework | 13 | All had participated in Embrace’s Healthy Moms class and had relocated as refugees to a small suburb in Georgia’s capital, Atlanta 3 Syrian, 2 Afghan, 4 Karen and 4 Congolese women4 FGs | < 1 year | 3 = Mixture of thick and thin (sample characteristics but no cultural information) | 3 = Some data transformation and theoretical interpretation |
| [Konje & Konje 2021 (71) Konje, JK; Konje, JC. Experiences of accessing maternity care in the UK: Perspectives from Somali migrant women in Leicester. EUROPEAN JOURNAL OF MIDWIFERY. 2021;5. DOI: 10.18332/ejm/143167](https://dx.doi.org/10.18332/ejm/143167) | **2021** | England, UK | To explore and describe views and experiences of Somali migrant women accessing maternity care before and during pregnancy in the UK, with the hope of gaining a better understanding of perceptions and factors that influence their access to care around pregnancy | *Data collection: focus groups, interviews Analysis:* constant comparison underpinned by grounded theory | 16 | Somali migrant women who had recently migrated to Leicester and had had a baby in UK 2 FGs with 5-6 women in each (one using an interpreter) and 5 interviews Time in UK ranged 5-11 years Aged 22-38 years old | Pregnant or <2 years | 4 = Thick contextual description | 4 = Extensive data transformation and theoretical interpretation |
| Li Li 2025 The vicious circle: how systemic barriers perpetuate maternity interpreting service inadequacies for migrant women in the UKFront. Glob. Women’s Health, 10 September 2025; Sec. Maternal Health; Volume 6 - 2025 | https://doi.org/10.3389/fgwh.2025.1638434 | **2025** | **UK** | This study employed a transformative mixed-methods approach to investigate systemic barriers in maternity interpreting services, focusing on interpreter retention, service availability, and video-mediated interpreting implementation, specifically Language Line Solutions’ interpreter-on-wheels (IOW). | *Data collection*: Semi-structured interviews, surveys, focus groups, ethnographic observations and service provider *Data analysis:*  reflexive thematic analysis and descriptive statistics. | **24** | Data were collected in the UK between 2019 and 2022 from seven key stakeholder groups: Migrant women (n = 24), support workers (n = 10), maternity care professionals (n = 46), interpreters (n = 159), bilingual health advocates (n = 7), language service providers (n = 6) and a commissioner. Total: 24, Interviews: 10, Focus group: 12,Observations: 2 Languages: Arabic (n = 6), Mandarin (n = 7), Kurdish Sorani (n = 3), Albanian (n = 4), Spanish (n = 2), Bengali (n = 1), Somali (n = 1) UK residence: 6 months–15 years Maternity access: 2008–2022 East London, East England, West Midlands, Northern English city | Access to maternity care 2008 - 2022 Recruitment: Dec 2019–Oct 2022 | 3 = Mixture of thick and thin (sample characteristics but no cultural information) | 3 = Some data transformation and theoretical interpretation |
| [Lindsay et al. 2016 Lindsay, AC; Gonçalves de Oliveira; MG; Wallington, SF; Greaney, ML; Tavares Machado, MM; Freitag Pagliuca, LM; Moura Arruda, CA. Access and utilization of healthcare services in Massachusetts, United States: a qualitative study of the perspectives and experiences of Brazilian-born immigrant women. BMC Health Services Research. 2016;16:1-8. DOI: 10.1186/s12913-016-1723-9](https://dx.doi.org/10.1186/s12913-016-1723-9) | **2016** | USA | To explore Brazilian immigrant women’s perspectives and experiences with healthcare services in the US to gain insights into factors amenable to interventions that may contribute to disparities in access to and utilization of services | *Data collection: focus groups Analysis*: thematic analysis | 35 | Brazilian-born immigrant women living in Massachusetts, US 5 focus groups with average of 6 (range 5–7) participants Ages from 26 - 56 years (mean 36.7 years) Women had on average 2 children (range 1–4) Most spoke Portuguese at home (92 %) Time living in US 2-20 years (mean 9 years) | Unknown | 3 = Mixture of thick and thin (sample characteristics but no cultural information) | 4 = Extensive data transformation and theoretical interpretation |
| [Liu et al. 2017 Liu, R; Chao, MT; Jostad-Laswell, A; Duncan, LG. Does ‘CenteringPregnancy’ Group Prenatal Care Affect the Birth Experience of Underserved Women? A Mixed Methods Analysis. JOURNAL OF IMMIGRANT AND MINORITY HEALTH. 2017;19(2):415-422. DOI: 10.1007/s10903-016-0371-9](https://dx.doi.org/10.1007/s10903-016-0371-9) | **2017** | USA | To examine the birth experience of immigrant and minority women and how Centering Pregnancy, a model of group prenatal care and childbirth education, influenced that experience | *Data collection: interviews and survey in first trimester and postnatal period Analysis*: thematic analysis using a phenomenological approach | 34 | Racially diverse Centering participants: American Indian/Alaska Native (n=3), African American (n=3), Latina (n=23), white (n=2), multi-racial (n=3) 24 women’s primary language was Spanish Average age of 29.7 years old 17 women were unemployed; 10 were homeless | Unknown | 3 = Mixture of thick and thin (sample characteristics but no cultural information) | 2 = Some interpretation |
| Lukasse 2025 Ukrainian refugee women’s experience with maternity care in Norway: A qualitative study, Mirjam Lukasse, Fatima Akhmedova, Hanna Oommen https://doi.org/10.18332/ejm/200613 | **2025** | Norway | To explore how newly arrived Ukrainian refugee women experience their maternity care in Norway | *Data collection:* semi structured interviews *Data analysis:* thematic analysis | **8** | The eight participants in our study were aged 25–38 years, four of them had a college/university education and had been in Norway between 2 and 20 months (Table 1). They had varying parity and method of childbirth (Table 1). Three main themes were identified, each with two subthemes as shown in Table 2. | 1-42 months | 3 = Mixture of thick and thin (sample characteristics but no cultural information) | 1 = No or minimal data transformation and interpretation |
| [Malmström et al. 2022 Malmstrom, N; Lydell, M; Carlsson, I. "Womanhood," a shared experience of participating in a lifestyle intervention with a focus on integration and physical activity to promote health among pregnant women: perspectives from pregnant women, midwives, and cultural interpreter doulas. International journal of qualitative studies on health and well-being. 2022;17(1):2043527. DOI: 10.1080/17482631.2022.2043527](https://dx.doi.org/10.1080/17482631.2022.2043527) | **2022** | Sweden | To explore the experiences of participating in a lifestyle intervention, named “Dancing for birth,” focusing on integration and physical activity, from the perspectives of the participating pregnant women, midwives, and cultural interpreter doulas | *Data collection: telephone interview Data Analysis*: Thematic analysis | 4 | 4 women—two foreign-born and two Swedish-born Aged 26-49 years | 1-6 months postnatal | 4 = Thick contextual description | 3 = Some data transformation and theoretical interpretation |
| [McClellan and Madler 2022 (75) McClellan, C; Madler, B. Lived Experiences of Mongolian Immigrant Women Seeking Perinatal Care in the United States. Journal of Transcultural Nursing 09// 2022;33(5):594-602. DOI: 10.1177/10436596221091689](https://dx.doi.org/10.1177/10436596221091689) | **2022** | USA | To explore the lived experiences of Mongolian immigrants seeking perinatal care in the USA | *Data collection: interviews Analysis:* thematic content analysis using interpretive phenomenology | 12 | Mongolian-born women currently living in the USA, who accessed healthcare in USA during pregnancy or delivery All over the age of 20 years | Unknown | 2 = Some context | 3 = Some data transformation and theoretical interpretation |
| McEvoy 2025 Evaluation of a co-designed digital animation in service improvement (DAISI) sharing messages around modifiable behaviours to reduce the risk of stillbirth. Midwifery, Volume 148, September 2025, 104517.  Bethan McEvoy, Kylie Watson, Kym Farrant, Tomasina Stacey T, Alexander E P Heazell, Melanie Haith-Cooper | **2025** | UK | To evaluate the acceptability and accessibility of the Stillbirth DAISI and its impact on knowledge of stillbirth and health behaviours that can reduce the risk of stillbirth | *Mixed method evaluation, underpinned by a pragmatic paradigm Data collection:* two structured telephone interviews *Data analysis:* statistical knowledge scoring of quantitative data, and content analysis of qualitative data | **29** | Ethnicity: African (n = 7); Asian/ British Asian (n = 4); Black/Black British (n = 2); Indian (n = 4); Pakistani (n = 7); White & Black Caribbean (n = 1); any other multiple ethnic background (n = 4); and prefer not to answer (n = 1). Languages: Multilingual (n = 22) Arabic (n = 8), English (n = 21), and Urdu (n = 10) Fluency in 13 other different languages. A telephone interpreter for 5 Arabic speaking women and 4 Urdu speaking women. Parity: primiparous (n = 13) and multiparous (n = 16) Age: 20-38 years. Undergraduate degree or higher (n = 21), a diploma or equivalent (n = 3), A-level or equivalent (n = 4), GCSE or similar (n = 1) or no educational status (n = 1). | 16-20 weeks pregnancy and again at 24-28 weeks pregnancy | 3 = Mixture of thick and thin (sample characteristics but no cultural information) | 3 = Some data transformation and theoretical interpretation |
| Nagesh 2024 South Asian women’s views on and experiences of maternity care services in Hong Kong: A qualitative study Women and Birth Volume 37, Issue 6, November 2024, 101806, Nitya Nagesh, Caroline Hoi Lam Ip, Emily Tsz Yan Leung, Janet Yuen-Ha Wong, Daniel YT Fong, Kris Yuet Wan Lok | **2024** | **Hong Kong** | To understand South Asian women’s views and experiences regarding maternity care services in Hong Kong. | Qualitative descriptive study *Data collection*: in depth one-on-one discussions (interviews) *Data analysis*: thematic analysis | **20** | Ages: 23 to 40 years, with a mean age of 32.7 years. Country of origin (15 out of 20) India. Pakistan = 4, Nepal = 1. Three women had lived in Hong Kong since birth, while the rest had lived there for 4–33 years, with an average length of residence in Hong Kong of 13 years. Parity: 13 = primiparous; 7 = multiparous. Only three women in the study could converse in Cantonese. | within the past 5 years | 3 = Mixture of thick and thin (sample characteristics but no cultural information) | 2 = Some interpretation |
| [Niner et al. 2013 Niner, S; Kokanovic, R; Cuthbert, D. Displaced mothers: birth and resettlement, gratitude and complaint. Medical anthropology. 2013;32(6):535-51. DOI: 10.1080/01459740.2013.769103](https://dx.doi.org/10.1080/01459740.2013.769103) | **2013** | Australia | To examine the effects of displacement on the lives of a group of ethnic minority Karen women from Burma-Myanmar through a focus on perinatal health | *Data collection: interviews Analysis*:general analysis with data organised into key themes | 15 | Karen women who had recently given birth in Australia 17 interviews - 2 women were asked for a 2nd interview All interviews used an interpreter All had lived in displaced persons camps around the Thai border for extended periods before arriving in Australia through associated legal humanitarian programs in past 5 years | Unknown | 4 = Thick contextual description | 3 = Some data transformation and theoretical interpretation |
| [Nithianandan et al. 2016 Nithianandan, N; Gibson-Helm, M; McBride, J; Binny, A; Gray, KM; East, C; Boyle, J. A Factors affecting implementation of perinatal mental health screening in women of refugee background. Implementation Science. 2016;11(1):150-150. DOI: 10.1186/s13012-016-0515-2](https://dx.doi.org/10.1186/s13012-016-0515-2) | **2016** | Australia | To (i) investigate barriers and enablers to implementing evidence-based, nationally recommended perinatal mental health screening and (ii) inform sustainable implementation of a screening and referral programme, in women of refugee background | *Data collection: semi-structured interviews. Analysis*:Thematic analysis using Theoretical Domains Framework and Cultural Competence Conceptual Framework | 9 | Women of refugee or asylum seeker background with a current or previous pregnancy No other information | Unknown | 4 = Thick contextual description | 3 = Some data transformation and theoretical interpretation |
| [Origlia Ikhilor et al. 2019 (57) Origlia Ikhilor, P; Hasenberg, G; Kurth, E; Asefaw, F; Pehlke-Milde, J; Cignacco, E. Journal of advanced nursing. Communication barriers in maternity care of allophone migrants: Experiences of women, healthcare professionals, and intercultural interpreters. 2019;75(10):2200-2210. DOI: 10.1111/jan.14093](https://dx.doi.org/10.1111/jan.14093) | **2019** | Switzerland | Describe the communication barriers faced by allophone migrant women when accessing maternity care services and produce recommendations to improve quality and access . | *Data collection: focus groups Analysis*: thematic analysis | 10 | All used maternity services in Switzerland antenatal-postpartum Country of origin: 6 Eritrea, 1 Albania, 3 Kosova Half understood simple German, half understood no/few words All had 1-4 children | <18 months | 3 = Mixture of thick and thin (sample characteristics but no cultural information) | 2 = Some interpretation |
| [Owens et al. 2016 Owens, C; Dandy, J; Hancock, P. Perceptions of pregnancy experiences when using a community-based antenatal service: A qualitative study of refugee and migrant women in Perth, Western Australia. Women and Birth. 2016;29(2):128-137. DOI: 10.1016/j.wombi.2015.09.003](https://dx.doi.org/10.1016/j.wombi.2015.09.003) | **2016** | Australia | To explore the perceptions of care experienced by refugees and migrant women of culturally and linguistically diverse backgrounds who had participated in a community-based antenatal programme specialising in maternity care of multicultural women | *Data collection: interviews Analysis*: thematic analysis using a phenomenological framework | 12 | Women who participated in a community-based antenatal service at a Health Centre specialising in services for women from culturally and linguistically diverse backgrounds within the last 10 months Aged 23-44 years old Many women were from refugee backgrounds who had entered Australia on Humanitarian visas Participants had lived in Australia for an average of 3.7 years (range 1–10 years) | Pregnant or <6 months postnatal | 3 = Mixture of thick and thin (sample characteristics but no cultural information) | 3 = Some data transformation and theoretical interpretation |
| Parzikova, 2024 Trust in maternity care: challenges for healthcare professionals and migrant women Nursing - Original article Alena Pařízková, Alena Glajchová DOI: 10.32725/kont.2024.027 | **2024** | Czech republic | To explore the experiences of migrant women accessing maternity care in the Czech Republic | *exploratory qualitative study, data collection:* in depth interviews  *data analysis* | **36** | The women were from five continents; half were from Europe. They mostly had long-term residence permits or were citizens of a European Union (EU) country.Most were married or cohabited with the father of their last child and had one or two children. They were between 19 and 43 years old. Most lived in urban areas in the five regions of the Czech Republic. | In the Czech Republic and no more than 3 years ago | 4 = Thick contextual description | 3 = Some data transformation and theoretical interpretation |
| [Pope and Roberson 2018 Pope, C; Roberson, J. The comparison of shared decision making in monolingual and bilingual health encounters. Communication & Medicine. 2018;15(2):206-221. DOI: 10.1558/cam.38674](https://dx.doi.org/10.1558/cam.38674) | **2018** | USA | To explore how women with limited English proficiency and the presence of a medical interpreter affected shared decision making in comparison of a monolingual and bilingual encounters with the same physician. | *Data collection: audio recorded antenatal appointments Analysis*: discourse analysis. | 16 | Medical visits were recorded with 8 Spanish speaking mothers (with hospital interpreters) and compared to appointments with 8 English speaking mothers (White n=4 and Black n=4) All Spanish speaking mothers were from Mexico | Pregnant women | 2 = Some context | 4 = Extensive data transformation and theoretical interpretation |
| [Pullon et al. 2014 Pullon, S; Gray, B; Steinmetz, M; Molineux, C. Midwifery-led care embedded within primary care: consumer satisfaction with a model in New Zealand. JOURNAL OF PRIMARY HEALTH CARE. 2014;6(4):319-323. DOI: 10.1071/HC14319](https://dx.doi.org/10.1071/HC14319) | **2014** | New Zealand | to investigate the feasibility of using focus groups and interviews to gauge consumer satisfaction of maternity care by high-needs women, and to explore their perceptions of the Newtown Union Health Service (NUHS) model of a midwifery-led service embedded in primary care in Wellington, New Zealand (NZ). | *Data collection: interviews and focus groups. Analysis*:theoretical perspective is the caritative caring theory and caring science tradition | 11 | High-needs women from 3 ethnic groups who had experienced a model of midwifery-led primary care service 2 NZ European (individual interviews), 6 Cambodian (5 in a focus group, 1 interview), and 3 Samoan (focus group) | 1-5 years postnatal | 3 = Mixture of thick and thin (sample characteristics but no cultural information) | 2 = Some interpretation |
| Rambaldini-Gooding, 2024 Cultural Humility in Action: Learning From Refugee and Migrant Women and Healthcare Providers to Improve Maternal Health Services in Australia, Delia Rambaldini-Gooding, Katarzyna Olcoń, Luke Molloy, Leissa Pitts, Sofia Lema, Eman Baghdadi, Jane Williams, Chris Degeling, 21 November 2024 https://doi.org/10.1111/hex.70106 | **2024** | Australia | To explore how to improve the experiences of migrant and refugee women with maternal health services through the lens of cultural humility | *World Café methodology Data collection:* mixed stakeholder group discussions and small group interviews for women with specific language needs  *Data analysis*: thematic analysis | 20 | Seven women participated in the group interviews: three from Arabic‐speaking backgrounds (Syria and Iraq) and four from Burmese and Karenni backgrounds. A member of the research team conducted the interviews in English and was supported by an interpreter. | unknown | 2 = Some context | 1 = No or minimal data transformation and interpretation |
| [Rayment-Jones et al. 2021 (70) Rayment-Jones, H; Harris, J; Harden, A; Silverio, SA; Turienzo, CF; Sandall, J. Project20: interpreter services for pregnant women with social risk factors in England: what works, for whom, in what circumstances, and how? International journal for equity in health. 2021;20(1):233. DOI: 10.1186/s12939-021-01570-8](https://dx.doi.org/10.1186/s12939-021-01570-8) | **2021** | England, UK | Explore whether women with social risk factors find interpreter services acceptable, accessible, and safe, and to suggest solutions to address the challenges | *Data collection: interviews Analysis:* thematic framework analysis. Realist design. | 8 | Non-English-speaking women, with at least one social risk factor, and low socioeconomic status (Indices of Multiple Deprivation score of higher than 30) AND/OR secondary school as highest level of education attained 21 interviews conducted Ethnicity: Asian (n=2), Black African (n=3), White other (n=3) Asylum seeker/refugee (n=5) Aged: 18-24 (n=1), 30-34 (n=4), >34 (n=3) | Interviewed at 28 and 36-weeks’ gestation, and 6 weeks postnatal | 2 = Some context | 3 = Some data transformation and theoretical interpretation |
| [Reid et al. 2021 (69) Reid, CN.; Fryer, K; Cabral, N; Marshall, J. Health care system barriers and facilitators to early prenatal care among diverse women in Florida. Birth. 2021;48(3):416-427. DOI: 10.1111/birt.12551](https://dx.doi.org/10.1111/birt.12551) | **2021** | USA | To identify barriers and facilitators to early prenatal care reported by women in Florida | *Data collection: survey then interviews Analysis*: theoretical framework, Phillippi & Khan | 55 | Country of origin: 33 USA, 6 Mexico, 5 Puerto Rico, 4 Honduras, 3 Dominican Republic, 1 El Salvador, 1 Guatemala, 1 Haiti. Race: 29 Hispanic, 12 non-Hispanic white, 9 non-Hispanic Black, 1 Asian, 5 other Women who did not receive prenatal care before 14 weeks, who were able to speak/read either English or Spanish Mean age 29 years | On postnatal ward | 3 = Mixture of thick and thin (sample characteristics but no cultural information) | 4 = Extensive data transformation and theoretical interpretation |
| [Riggs et al. 2017 Riggs, E; Muyeen, S; Brown, S; Dawson, W; Petschel, P; Tardiff, W; Norman, F; Vanpraag, D; Szwarc, J; Yelland, J. Cultural safety and belonging for refugee background women attending group pregnancy care: An Australian qualitative study. Birth. 2017;44(2):145-152. DOI: 10.1111/birt.12272](https://dx.doi.org/10.1111/birt.12272) | **2021** | Australia | To explore the experiences of using a community-based model of group pregnancy care for Karen women, and whether it had helped them feel prepared for childbirth and going home with a new baby | *Data collection: focus groups Analysis*: *t*hematic analysis | 19 | Karen women who had participated in the first year of the community-based model of group pregnancy care program Most were born in refugee camps on the Thai-Burma border, with the majority migrating directly to Australia as part of the Humanitarian program Average time in Australia 4.3 years 9 women were first-time mothers and 10 multiparous, nine of whom had previously given birth in a refugee camp | Postnatal women who had participated in the first year of the program (unknown) | 4 = Thick contextual description | 2 = Some interpretation |
| [Rowe et al. 2023 Rowe A; Bhardwaj M; McCauley M. Maternal multimorbidity - experiences of women seeking asylum during pregnancy and after childbirth: a qualitative study. BMC Pregnancy and Childbirth. 2023;23(1):789. DOI: 10.1186/s12884-023-06054-x](https://dx.doi.org/10.1186/s12884-023-06054-x) | **2023** | UK | To explore the impact of the asylum-seeking process, understanding of wellbeing, expressed health needs, and the experiences of maternity care of women seeking asylum during pregnancy and after childbirth in Liverpool, UK | *Data collection: interviews and focus groups Data Analysis:* reflexive thematic analysis. | 14 | Aged 24-47 years old (median age 33) Participants were from Nigeria (5); Albania (2); Egypt (2); Pakistan (2); Iran (1), Georgia (1), and Namibia (1) | Pregnant or after childbirth (unknown) | 3 = Mixture of thick and thin (sample characteristics but no cultural information) | 2 = Some interpretation |
| [Sami et al. 2019 (59) Sami, J; Quack Lotscher, K C; Eperon, I; Gonik, L; Martinez de Tejada, B; Epiney, M; Schmidt, NC. Giving birth in Switzerland: a qualitative study exploring migrant women's experiences during pregnancy and childbirth in Geneva and Zurich using focus groups. Reproductive health. 2019;16(1):112. DOI: 10.1186/s12978-019-0771-0](https://dx.doi.org/10.1186/s12978-019-0771-0) | **2019** | Switzerland | Describe the experiences of migrant women with pregnancy and maternity services at two main hospitals of Geneva and Zurich and to identify specific barriers for health care accessibility | *Data collection: focus groups Analysis:* thematic analysis | 33 | 6 FGs of migrant women (7 pregnant, 26 postpartum) from countries including Bangladesh, Brazil, Eritrea, Dominican Republic, Peru, Bolivia Average time in Switzerland 5.5 years Age on average 29 years old (range 21-40) Some FGs used interpreters | Pregnant or <1 year | 3 = Mixture of thick and thin (sample characteristics but no cultural information) | 2 = Some interpretation |
| Smith 2025 Smith DC, Thumm EB, Tien NC(G) and Kissler K (2025) Respectful maternity care experiences of South Asian refugees in the US: a qualitative study. Front. Public Health 13:1613249. doi: 10.3389/fpubh.2025.1613249 | **2025** | **USA** | To understand the experiences of recent refugees from ethnic communities displaced from southern Asia and resettled in the United States | *Data collection:* focus group discussions with three refugee communities *Data analysis*: thematic analysis | 15 | Study participants included 15 individuals, ranging in age from 20 to 37 years old, with children ranging in age from 3 months to 14 years old. All participants gave birth in the US recently, a few participants had also previously given birth outside the US, mostly at a refugee relocation site in south Asia. | In the USA within last 3 years | 4 = Thick contextual description | 4 = Extensive data transformation and theoretical interpretation |
| Söderström 2024 Söderström E, Alexandrou C, Bressanutti S, Sandborg J, Lindqvist A-K, Löf M. Adapting a pregnancy app (HealthyMoms) to support healthy habits in migrant women—a qualitative study on women’s preferences and perceived needs to support health behaviors during pregnancy. DIGITAL HEALTH. 2024;10. doi:10.1177/20552076241304045 | **2024** | Sweden | To explore (a) perceptions and needs of knowledge and support related to pregnancy and lifestyle behaviorsand (b) needs of and attitudes towards a pregnancy app and how features and content in the app can be adapted to supporthealthier lifestyle behaviors in migrant women. | *Data collection*: semi-structured interviews *Data analysis*: content analysis (inductive latent approach) | 19 | Arabic (n=10) and Somali-speaking women (n=9). The participating women were on average 29 (SD 6) years old (range 20–41 years),63% (n=12) were nulliparous and participants covered a wide range of gestational weeks (14–40 weeks), although the majority were in their third trimester. The sample included women that recently had come to Sweden as well as those who had been living in the country for a longer period (time in Sweden: 7 [SD 6] years; range 0.5–18 years). Five women had a university degree (26%), while the remaining had finished elementary school (n=6, 32%) or high school (n=4, 21%) or had not gone to school (n=3, 16%). One participant did not report her educational background. The Arabic-speakingwomen were born in Syria (n=3), Iraq (n=5), Sudan (n=1), and Eritrea (n=1). | Recruited during pregnancy | 4 = Thick contextual description | 3 = Some data transformation and theoretical interpretation |
| [Stapleton et al. 2013 Stapleton, H; Murphy, R; Correa-Velez, I; Steel, M; Kildea, S. Women from refugee backgrounds and their experiences of attending a specialist antenatal clinic. Narratives from an Australian setting. Women & Birth. 2013;26(4):260-266. DOI: 10.1016/j.wombi.2013.07.004](https://dx.doi.org/10.1016/j.wombi.2013.07.004) | **2013** | Australia | To explore whether maternity care for women from refugee backgrounds attending a specialist antenatal clinic in a tertiary Australian public hospital, could be improved | *Data collection: focus groups Analysis*:thematic analysis | 18 | Refugee/immigrant women attending a specialist antenatal clinic with countries of origin including Somalia, Sudan, Afghanistan, Burundi and Liberia 4 focus groups | Unknown | 4 = Thick contextual description | 2 = Some interpretation |
| [Ternström et al. 2023 Ternström, E; Small, R; Lindgren, H. Migrant women's experiences of an individual language-assisted information and support visit to the labor ward before giving birth – A qualitative study from Sweden. Sexual & Reproductive HealthCare. 2023;38. DOI: 10.1016/j.srhc.2023.100915](https://dx.doi.org/10.1016/j.srhc.2023.100915) | **2023** | Sweden | To explore migrant women’s experiences of antenatal care including receiving language-assisted information and support during pregnancy through a two-hour INFOR-visit to the labor ward | *Data collection: interviews Analysis:* reflexive thematic analysis. | 10 | Non-Swedish speaking migrant women, from: Macedonia, Pakistan, France, Bangladesh, Iraq, Syria, Romania, Somalia, Georgia. 1-5 years in Sweden Aged 19-34 years old | Unknown | 3 = Mixture of thick and thin (sample characteristics but no cultural information) | 2 = Some interpretation |
| [Tobin et al. 2014 Tobin, C; Murphy-Lawless, J; Tatano Beck, C. Childbirth in exile: Asylum seeking women's experience of childbirth in Ireland. Midwifery. 2014;30(7):831-838. DOI: 10.1016/j.midw.2013.07.012](https://dx.doi.org/10.1016/j.midw.2013.07.012) | **2014** | Ireland | To gain insight into women's experiences of childbirth in Ireland while in the process of seeking asylum | *Data collection: unstructured interviews (narratives) Analysis*:structural approach to narrative analysis using Burke's dramatistic pentad | 22 | Women who had experienced pregnancy and childbirth while seeking refuge or asylum in Ireland Participants came from 9 countries with the majority were from Nigeria Aged 18-40 years; average of 30 Interpreters used in 2 interviews There was prolonged engagement over 3 years with contact at 2-3 month intervals Time in Ireland <9 weeks to 3.5 years | Experience of pregnancy and child- birth while seeking refuge or asylum in Ireland - 9 weeks to 3.5 years | 3 = Mixture of thick and thin (sample characteristics but no cultural information) | 4 = Extensive data transformation and theoretical interpretation |
| Toke et al. 2024 Toke, S; Correa-Velez, I; Riggs, E. Exploring Trauma- and Violence-Informed Pregnancy Care for Karen Women of Refugee Background: A Community-Based Participatory Study. Int. J. Environ. Res. Public Health 2024, 21, 254. https://doi.org/10.3390/ ijerph21030254 | **2024** | Australia | To explore Karen women’s perspectives of trauma- and violence-informed pregnancy care in Melbourne, Australia | *Data collection: interviews Analysis: r*eflexive thematic analysis | 7 | S’gaw Karen-speaking women of refugee background  5 women were born in Burma and 2 in Thailand All required interpreting services and received standard model public maternity care Aged 20-40 years old Average of 2 children each, with >1 born in Australia Time in Australia between 3-9 years (average 4.5) | <2 years | 4 = Thick contextual description | 3 = Some data transformation and theoretical interpretation |
| Topa et al. 2017 Topa, JB; Nogueira, CO; Neves, SA. "Maternal health services: an equal or framed territory?" International Journal of Human Rights in Healthcare. 2017; 10(2)110-122.  https://doi.org/10.1108/IJHRH-11-2015-0039 | **2017** | Portugal | To explore the engagement of Ukrainian immigrant women on maternal and child healthcare services, their perceptions and experiences. | *Data collection: interviews Analysis*: thematic analysis using a critical feminist and social constructionist perspective | 10 | Ukrainian women who gave birth in Portugal Lived in Portugal for 5-11 years Aged 28-49 years old All had 1-2 children | Pregnant or had given birth (unknown) | 4 = Thick contextual description | 4 = Extensive data transformation and theoretical interpretation |
| [Utne et al. 2020 (65) Utne, R; Antrobus-Johannessen, CL; Aasheim, V; Aasekjaer, K; Vik, ES. Somali women's experiences of antenatal care: A qualitative interview study. Midwifery. 2020;83(8510930, mwf):102656. DOI: 10.1016/j.midw.2020.102656](https://dx.doi.org/10.1016/j.midw.2020.102656) | **2020** | Norway | To explore Somali women’s experiences of antenatal care in Norway | *Data collection: interviews Analysis:* systematic text condensation | 8 | Somali-born mothers who gave birth in Norway Aged 22-35 years 2 nulliparous and 6 parous (2-5 children) women All interviews were in Norwegian but not all women could speak this language when they gave birth | <7 years | 4 = Thick contextual description | 3 = Some data transformation and theoretical interpretation |
| Vasquez Corona, 2025 Migrant Mums and Maternity Care: A Qualitative Participatory Health Research Study Martha Vazquez Corona, Alya Hazfiarini, Jenny Cao, Rosi Aryal Lees, Delaram Ansari, Giang Tran, Mridula Shankar, Karen Block, Meghan A. Bohren First published: 19 June 2025 https://doi.org/10.1111/1471-0528.18249 | **2025** | Melbourne, Australia | To explore the expectations and experiences of migrant women, including international students, in using maternity care services and describe factors affecting their access and use of these services. | This is a qualitative participatory research study. Data were collected through 12 photo-elicitation workshops and 20 semi-structured in-depth interviews. Data analysis: inductive reflexive thematic analysis in a collaborative process with participants, community partners and academic researchers. | 21 | Most (71.4%) had their first pregnancy in Australia. All women had a bachelor's degree (or higher) and four international students were pursuing a doctoral degree. Twenty-one migrant women who had been pregnant or given birth since 2021 and were either international students, and/or born in Vietnam or Indonesia. Country of birth:  Indonesia 10 (47.6%) Vietnam 3 (14.3%), International students, Sri Lanka 1 (4.8%), Afghanistan 1 (4.8%), Brazil 1 (4.8%), China 1 (4.8%), Colombia 4 (19.0%) Age (years): 29–33 9 (42.9%), 34–38 12 (57.1%) | Pregnancy or birth since 2021 | 3 = Mixture of thick and thin (sample characteristics but no cultural information) | 3 = Some data transformation and theoretical interpretation |
| Velemínsky et al. 2014 Velemínsky, M; Pruchová, D; Vránová, V; Samková, J; Samek, J; Porche, S; Lukásová, E; Liska, J. Medical and salutogenic approaches and their integration in taking prenatal and postnatal care of immigrants. NEUROENDOCRINOLOGY LETTERS. 2014;35:67-79. PMID: 25433357. | **2014** | Czech Republic | To compile a proposal of the system of taking complex prenatal, perinatal and postnatal care of pregnant immigrants in the Czech Republic with taking into account medical and salutogenic approaches | *Data collection: controlled interviews based on a questionnaire with 4 open questions Analysis*: not reported | 193 | Immigrants having had a child/children originating from Vietnam (n=65), Mongolia (n=35) and Ukraine (n=93) Mongolian women aged 20-46 years - average age was 31.4 years Vietnamese women aged 20-57 years - average age was 33.2 years Ukrainian women aged 25-65 years - average age was 40.7 years | Unknown | 4 = Thick contextual description | 2 = Some interpretation |
| [Vik et al. 2022 (76) Vik, ES; Hashi, RMA; Hamud, ME; Aasheim, V; Kringeland, T; Aasekjær, K. Migrant Somali women's experiences with their first contact with the labor ward prior to admission: A qualitative study. EUROPEAN JOURNAL OF MIDWIFERY 2022;6. DOI: 10.18332/ejm/150584](https://dx.doi.org/10.18332/ejm/150584) | **2022** | Norway | To explore migrant Somali women’s experiences with their first contact with the labour ward prior to admission | *Data collection: interviews Analysis:* systematic text condensation | 10 | Somali-born women who had given birth in Norway Lived in Norway mean 12 years, range 5-25 Mean age 31 years, range 26-38 Number of children 1-6 births Language ability ranged from no Norwegian (n=4) to fluent (n=2) | <10 years | 3 = Mixture of thick and thin (sample characteristics but no cultural information) | 3 = Some data transformation and theoretical interpretation |
| [Viken et al. 2015 Viken, B; Lyberg, A; Severinsson, E. Maternal Health Coping Strategies of Migrant Women in Norway. NURSING RESEARCH AND PRACTICE. 2015;2015. DOI: 10.1155/2015/878040](https://dx.doi.org/10.1155/2015/878040) |  | Norway | To explore the maternal health coping strategies of migrant women in Norway | *Data collection: interviews Analysis*:content analysis with ecological theory using a hermeneutic approach | 17 | Women from South America, Europe, the Middle East, Asia, and Africa Lived in Norway from 1-20 years Interpreters used for 5 interviews Woman had 1-8 children | <1 year | 3 = Mixture of thick and thin (sample characteristics but no cultural information) | 3 = Some data transformation and theoretical interpretation |
| [Wan et al. 2023 Wan, CS; Nankervis, A; Teede, H; Aroni, R. Priorities to improve woman‐centred gestational diabetes mellitus care: A qualitative study to compare views between clinical and consumer end‐users. Journal of Human Nutrition and Dietetics. 2023;36(5):1636-1648. DOI: 10.1111/jhn.13191](https://dx.doi.org/10.1111/jhn.13191) | **2023** | Australia | To compare the views of ethnic Chinese and Australian‐born Caucasian women and their HCPs about what constitutes optimal GDM care and how to improve woman‐centred GDM care | *Data collection: interviews Analysis:* reflexive thematic analysis | 42 | Chinese women with Gestation Diabetes (GDM) Aged 32 years old (average) | In 3rd trimester of pregnancy | 4 = Thick contextual description | 3 = Some data transformation and theoretical interpretation |
| [Wikberg et al. 2014 Wikberg, A; Eriksson, K; Bondas, T.Immigrant New Mothers in Finnish Maternity Care: An Ethnographic Study of Caring. INTERNATIONAL JOURNAL OF CHILDBIRTH. 2014;4(2):86-102. DOI: 10.1891/2156-5287.4.2.86](https://dx.doi.org/10.1891/2156-5287.4.2.86) |  | Finland | To illuminate experiences and perceptions of caring in the maternity care culture of immigrant new mothers in Finland | *Data collection: ethnography and interviews Analysis*:Boyatzis’ thematic analytic approach | 17 | Immigrant women from Australia, Bosnia, Columbia, Estonia, Hungary, India, Iraq, Russia, Thailand, Uganda, Vietnam Time in Finland 2 months to 10 years Aged 19-36 years old Had 1-4 children each | Pregnant or had given birth 1-3 days earlier | 4 = Thick contextual description | 2 = Some interpretation |
| [Willey et al. 2020 (62) Willey, SM; Blackmore, RP; Gibson-Helm, ME; Ali, R; Boyd, LM; McBride, J; Boyle, JA. "If you don't ask ... you don't tell": Refugee women's perspectives on perinatal mental health screening. Women and birth. 2020;33(5):e429-e437. DOI: 10.1016/j.wombi.2019.10.003](https://dx.doi.org/10.1016/j.wombi.2019.10.003) | **2020** | Australia | To determine if a digital perinatal mental health screening program is feasible and acceptable for women of refugee background | *Data collection: semi-structured telephone interviews and focus groups Analysis:* inductive and deductive thematic analysis | 22 | Country of origin: Afghanistan (n=10), India (n=3), Vietnam (n=2), Burma (n=7)Refugee background (n=17), migrant background (n=5) One focus group with 5 women and 17 individual interviews | Pregnant or <12 months | 4 = Thick contextual description | 3 = Some data transformation and theoretical interpretation |
| Wiseman 2024 Midwifery Volume 139, December 2024, 104197 Involving women with limited English proficiency in group antenatal care: Findings from the integrated process evaluation of the Pregnancy Circles pilot trial; Octavia Wiseman Christine McCourt, Anita Mehay, Giordana da Motta, Helliner Robinson, Kade Mondeh, Lorna Sweeney, Meg Wiggins, Mary Sawtell, Angela Harden, REACH Research Team | **2024** | England, UK | To explore whether linguistic diversity could be incorporated into group antenatal care (Pregnancy Circles). A - To examine the attendance, experience and satisfaction with PC for women with LEP, facilitators and English-speaking participantsB - To understand the preferences and provision of interpreting services in PC to explore how PC mechanisms of effect might function for women with LEP | *Data collection:* one to one interviews and observations of PC *Data analysis:* Reflexive thematic analysis (Braun and Clarke, 2019) using a framework devised from feasibility study findings and the aims of the pilot trial was applied to explore patterns of shared meaning across the dataset. | 10 | Ten women consented to be interviewed, including four with LEP. Women interviewed reflected the ethnic mix of participants in the pilot trial (Asian 5, White Other 2, White English/Irish 2, Black 1). Six interviewees were multiparous, and half were born outside the UK. Seven facilitating midwives and four support staff agreed to be interviewed (Table 1). Two PC sessions where language support was needed were observed (PC1 and PC2). | Current - women recruited to antenatal care | 2 = Some context | 4 = Extensive data transformation and theoretical interpretation |
| [Worabo et al. 2024 Worabo, HJ; Safi, F; Gill, SL; Farokhi, M. “It’s different here” Afghan refugee maternal health experiences in the United States. BMC Pregnancy and Childbirth. 2024;24:1-12. DOI: 10.1186/s12884-024-06678-7](https://dx.doi.org/10.1186/s12884-024-06678-7) | **2024** | USA | To better understand Afghan women’s maternal health experiences in South Texas as a step toward designing culturally sensitive care | *Data collection: interviews Analysis:* qualitative content analysis | 20 | Afghan refugees who gave birth in the US and who had attended the postpartum program a refugee social service agency 6 in person and 14 telephone interviews | <2 years | 4 = Thick contextual description | 2 = Some interpretation |
| [Yelland et al. 2016* Yelland, J; Riggs, E; Szwarc, J; Casey, S; Duell-Piening, P; Chesters, D; Wahidi, S; Fouladi, F; Brown, S. 2016 Compromised communication: a qualitative study exploring Afghan families and health professionals’ experience of interpreting support in Australian maternity care. BMJ Quality & Safety. 2016;25:4.](https://dx.doi.org/10.1136/bmjqs-2014-003837) | **2016** | Australia | To describe Afghan women's and men's experiences of language support during pregnancy check-ups, labour and birth | *Data collection: interviews. Analysis*:Thematic analysis using Green et al framework | 16 | Afghan women who had had a baby in Australia All were born in Afghanistan and spoke an Afghan language at home Interpreters were used | 4–12 months postnatal | 4 = Thick contextual description | 2 = Some interpretation |

### Additional File 4 Summary of quality appraisals of included studies using CASP

| **Authors, Date** | **Aim** | **Method** | **Design** | **Recruitment** | **Data Collection** | **Reflexivity** | **Ethics** | **Analysis** | **Findings** | **Value** |
| --- | --- | --- | --- | --- | --- | --- | --- | --- | --- | --- |
| **Ali Alruwaili et al 2025** | Yes | Yes | Yes | Yes | Yes | Yes | Yes | Yes | Yes | Yes |
| **Alsamman 2025** | Yes | Yes | Yes | Yes | Yes | Somewhat | Yes | Yes | Yes | Yes |
| **Andrén et al. 2023** | Yes | Yes | Yes | Yes | Yes | Yes | Yes | Yes | Yes | **Yes** |
| **Appiah-Kubi 2024** | Yes | Yes | Yes | Yes | Yes | Yes | Yes | Yes | Yes | Yes |
| **Ayers et al. 2018** | Yes | Yes | Yes | Yes | Yes | No | Yes | Yes | Yes | **Yes** |
| **Bains et al. 2021** | Yes | Yes | Yes | Yes | Yes | No | Yes | Yes | Yes | **Yes** |
| **Bawadi et al. 2020** | Yes | Yes | Yes | Yes | Yes | No | No | Yes | Yes | **Yes** |
| **Belton et al. 2018** | Yes | Yes | Yes | Yes | Yes | No | Yes | Yes | Yes | **Yes** |
| **Benzaken 2025** | Yes | Yes | Yes | Yes | Yes | Somewhat | Yes | Yes | Yes | Yes |
| **Biggs 2025** | Yes | Yes | Yes | Yes | Yes | Somewhat | Yes | Yes | Yes | Yes |
| **Bitar and Oscarsson 2020** | Yes | Yes | Yes | Yes | Yes | No | Yes | Yes | Yes | **Yes** |
| **Boyvat 2025** | Yes | Yes | Yes | Yes | Yes | Can't tell | No | Yes | Yes | Yes |
| **Brown-Johnson 2025** | Yes | Yes | Yes | Yes | Yes | Somewhat | Yes | Yes | Yes | Yes |
| **Cai et al. 2022*** | Yes | Yes | Yes | Yes | Yes | No | Yes | Yes | Yes | **Yes** |
| **Cai et al. 2024*** | Yes | Yes | Yes | Yes | Yes | Yes | Yes | Yes | Yes | **Yes** |
| **Carlsson et al. 2016** | Yes | Yes | Yes | Yes | Yes | No | Yes | Yes | Yes | **Yes** |
| **Ceulemans et al. 2020** | Yes | Yes | Yes | Yes | Yes | No | Yes | Yes | Yes | **Yes** |
| **Chu et al. 2017** | Yes | Yes | Yes | Yes | Yes | Can’t tell | Yes | Yes | Yes | **Yes** |
| **Claerbout 2024** | Yes | Yes | Yes | Yes | Yes | Yes | Yes | Yes | Yes | Yes |
| **Claisse 2024** | Yes | Yes | Yes | Yes | Yes | Somewhat | Yes | Yes | Yes | Yes |
| **Darivemula 2024** | Yes | Yes | Yes | Yes | Yes | No | Yes | Yes | Yes | Yes |
| **Doering et al. 2015** | Yes | Yes | Yes | Yes | Yes | No | Yes | Can’t tell | Yes | **Yes** |
| **Dube et al. 2024** | Yes | Yes | Yes | Yes | Yes | Yes | Yes | Yes | Yes | **Yes** |
| **Dullat 2025** | Yes | Yes | Yes | Yes | Yes | Somewhat | Yes | Yes | Yes | Yes |
| **Engelhardt et al 2025** | Yes | Yes | Yes | Yes | Yes | Somewhat | Yes | Yes | Yes | Yes |
| **Evans et al. 2022** | Yes | Yes | Yes | Yes | Yes | No | Yes | Yes | Yes | **Yes** |
| **Fair 2025** | Yes | Yes | Yes | Yes | Yes | Yes | Yes | Yes | Yes | Yes |
| **Filby et al. 2020** | Yes | Yes | Yes | Yes | Yes | No | Yes | Yes | Yes | **Yes** |
| **Fitzgerald et al. 2016** | Yes | Yes | Yes | Yes | Yes | No | No | Yes | Yes | **Yes** |
| **Furness 2025** | Yes | Yes | Yes | Yes | Yes | Somewhat | Yes | Yes | Yes | Yes |
| **Gallimore et al. 2021** | Yes | Yes | Yes | Yes | Yes | Yes | Yes | Yes | Yes | **Yes** |
| **Garnweidner-Holme et al. 2017** | Yes | Yes | Yes | Yes | Yes | No | Yes | Yes | Yes | **Yes** |
| **Gewalt et al. 2018** | Yes | Yes | Yes | Yes | Yes | Yes | Yes | Yes | Yes | **Yes** |
| **Granada et al. 2022** | Yes | Yes | Yes | Yes | Yes | No | No | Can’t Tell | Yes | **No** |
| **Guðmundsdóttir 2025** | Yes | Yes | Yes | Yes | Yes | Yes | Yes | Yes | Yes | Yes |
| **Guo et al. 2018** | Yes | Yes | Yes | Yes | Yes | No | Yes | Yes | Yes | **Yes** |
| **Hatherall et al. 2016** | Yes | Yes | Yes | Yes | Yes | No | Yes | Yes | Yes | **Yes** |
| **Henrique et al. 2023** | Yes | Yes | Yes | Yes | Yes | No | Yes | Yes | Yes | **Yes** |
| **Henry et al. 2020** | Yes | Yes | Yes | Yes | Yes | No | Yes | Yes | Yes | **Yes** |
| **Higginbottom et al. 2015*** | Yes | Yes | Yes | Yes | Yes | No | Yes | Yes | Yes | **Yes** |
| **Higginbottom et al. 2016*** | Yes | Yes | Yes | Yes | Yes | Yes | Yes | Yes | Yes | **Yes** |
| **Ikhilor et al. 2019** | Yes | Yes | Yes | Yes | Yes | Yes | Yes | Yes | Yes | **Yes** |
| **Iturralde et al. 2021** | Yes | Yes | Yes | Yes | Yes | No | Yes | Yes | Yes | **Yes** |
| **Johansson 2025** | Yes | Yes | Yes | Yes | Yes | Yes | Yes | Yes | Yes | Yes |
| **John et al. 2021** | Yes | Yes | Yes | Yes | Yes | No | Yes | Yes | Yes | **Yes** |
| **Johnsen et al. 2020** | Yes | Yes | Yes | Yes | Yes | No | Yes | Yes | Yes | **Yes** |
| **Kirkendall and Dutt 2023** | Yes | Yes | Yes | Yes | Yes | Yes | No | Yes | Yes | **Yes** |
| **Konje and Konje 2021** | Yes | Yes | Yes | Yes | Yes | No | Yes | Yes | Yes | **Yes** |
| **Li Li 2025** | Yes | Yes | Yes | Yes | Yes | No | Yes | Yes | Yes | Yes |
| **Lindsay et al. 2016** | Yes | Yes | Yes | Yes | Yes | No | Yes | Yes | Yes | **Yes** |
| **Liu et al. 2017** | Yes | Yes | Yes | Yes | Yes | No | Yes | Yes | Yes | **Yes** |
| **Lukasse 2025** | Yes | Yes | Yes | Yes | Yes | No | Yes | Yes | Yes | Yes |
| **Malmström et al. 2022** | Yes | Yes | Yes | Yes | Yes | No | Yes | Yes | Yes | **Yes** |
| **McClellan and Madler 2022** | Yes | Yes | Yes | Yes | Yes | No | Yes | Yes | Yes | **Yes** |
| **McEvoy 2025** | Yes | Yes | Yes | Yes | Yes | No | Yes | Yes | Yes | Yes |
| **Nagesh 2024** | Yes | Yes | Yes | Yes | Yes | Somewhat | Yes | Yes | Yes | Yes |
| **Niner et al. 2013** | Yes | Yes | Yes | Yes | Yes | No | No | No | Yes | **No** |
| **Nithianandan et al. 2016** | Yes | Yes | Yes | Yes | Yes | Yes | Yes | Yes | Yes | **Yes** |
| **Owens et al. 2016** | Yes | Yes | Yes | Yes | Yes | Yes | Yes | Yes | Yes | **Yes** |
| **Pařízková 2024** | Yes | Yes | Yes | Yes | Yes | No | Can't tell | Yes | Yes | Yes |
| **Pope and Roberson 2018** | Yes | Yes | Yes | Yes | Yes | No | Yes | Yes | Yes | **Yes** |
| **Pullon et al. 2014** | Yes | Yes | Yes | Yes | Yes | No | Yes | No | Yes | **No** |
| **Rambaldini-Gooding, 2024** | Yes | Yes | Yes | Yes | Yes | Can't tell | Yes | Yes | Yes | Yes |
| **Rayment-Jones et al. 202** | Yes | Yes | Yes | Yes | Yes | No | Yes | Yes | Yes | **Yes** |
| **Reid et al. 2021** | Yes | Yes | Yes | Yes | Yes | No | Yes | Yes | Yes | **Yes** |
| **Riggs et al. 2017** | Yes | Yes | Yes | Yes | Yes | No | Yes | Yes | Yes | **Yes** |
| **Rowe et al. 2023** | Yes | Yes | Yes | Yes | Yes | Yes | Yes | Yes | Yes | **Yes** |
| **Sami et al. 2019** | Yes | Yes | Yes | Yes | Yes | No | Yes | Yes | Yes | **Yes** |
| **Smith, 2025** | Yes | Yes | Yes | Yes | Yes | Yes | Yes | Yes | Yes | Yes |
| **Söderström 2024** | Yes | Yes | Yes | Yes | Yes | Yes | Yes | Yes | Yes | Yes |
| **Stapleton et al. 2013** | Yes | Yes | Yes | Yes | Yes | No | Yes | Yes | Yes | **Yes** |
| **Ternström et al. 2023** | Yes | Yes | Yes | Yes | Yes | Yes | Yes | Yes | Yes | **Yes** |
| **Tobin et al. 2014** | Yes | Yes | Yes | Yes | Yes | Yes | Yes | Yes | Yes | **Yes** |
| **Toke et al. 2024** | Yes | Yes | Yes | Yes | Yes | Yes | Yes | Yes | Yes | **Yes** |
| **Topa et al. 2017** | Yes | Yes | Yes | Yes | Yes | No | No | Yes | Yes | **Yes** |
| **Utne et al. 2020** | Yes | Yes | Yes | Yes | Yes | No | Yes | Yes | Yes | **Yes** |
| **Vasquez Corona, 2025** | Yes | Yes | Yes | Yes | Yes | Yes | Yes | Yes | Yes | Yes |
| **Velemínsky et al. 2014** | Yes | Can’t tell | Yes | Yes | Yes | No | No | No | Yes | **No** |
| **Vik et al. 2022** | Yes | Yes | Yes | Yes | Yes | No | Yes | Yes | Yes | **Yes** |
| **Viken et al. 2015** | Yes | Yes | Yes | Yes | Yes | No | Yes | Yes | Yes | **Yes** |
| **Wan et al. 2023** | Yes | Yes | Yes | Yes | Yes | Yes | Yes | Yes | Yes | **Yes** |
| **Wikberg et al. 2014** | Yes | Yes | Yes | Yes | Yes | No | Yes | Yes | Yes | **Yes** |
| **Willey et al. 2020** | Yes | Yes | Yes | Yes | Yes | Can’t Tell | Yes | Yes | Yes | **Yes** |
| **Wiseman 2024** | Yes | Yes | Yes | Yes | Yes | No | Yes | Yes | Yes | Yes |
| **Worabo et al. 2024** | Yes | Yes | Yes | Yes | Yes | Yes | Yes | Yes | Yes | **Yes** |
| **Yelland et al. 2016*** | Yes | Yes | Yes | Yes | Yes | No | Yes | No | Yes | **Yes** |

### Additional File 5. Summary of Qualitative Findings Table – Confidence in Review Findings using GRADE-CERQual

| **#** | **Summarised review finding** | **Methodological limitations** | **Coherence** | **Adequacy** | **Relevance** | **GRADE-CERQual assessment of confidence** | **References** |
| --- | --- | --- | --- | --- | --- | --- | --- |
| **BENEFITS OF WOMEN’S POSITIVE EXPERIENCES AND INTERACTIONS WITH MATERNITY STAFF IN HOST COUNTRIES** | | | | | | | |
| 1 | B i.  Improved host language and healthcare system fluency, and community integration | No/Very minor concerns  **Explanation:** No/very minor concerns regarding methodological limitations because Most papers are methodologically sound, robustly reported and main gaps stem from lack of reporting around reflexivity of authors | No/Very minor concerns  **Explanation:** No/very minor concerns regarding coherence because no or limited concerns about the fit between the data from primary studies and the review finding | Minor concerns  **Explanation:** Minor concerns regarding adequacy because some concerns regarding the degree of richness or quantity of data supporting a review finding. | No/Very minor concerns | Moderate confidence  **Explanation:** No/Very minor concerns regarding methodological limitations, No/Very minor concerns regarding coherence, and No/Very minor concerns regarding relevance. Minor concerns regarding adequacy, because of limited data within the included studies which are specific to this review finding. | Ceulemans et al. 2020; Evans et al. 2022; Guðmundsdóttir et al. 2025; Henry et al. 2020; Johansson M. et al. 2025; Kirkendall & Dutt 2023; McEvoy et al. 2025; Owens et al. 2016; Viken et al. 2015; Wikberg et al. 2014; Wiseman et al. 2024; |
| 2 | B ii.  Positive culturally safe perinatal care and birth experiences | No/Very minor concerns  **Explanation:** No/very minor concerns regarding methodological limitations because Most papers are methodologically sound, robustly reported and main gaps stem from lack of reporting around reflexivity of authors | No/Very minor concerns  **Explanation:** No/very minor concerns regarding coherence because no or limited concerns about the fit between the data from primary studies and the review finding | Minor concerns  **Explanation:** Minor concerns regarding adequacy because some concerns regarding the degree of richness or quantity of data supporting a review finding. | No/Very minor concerns | Moderate confidence  **Explanation:** No/Very minor concerns regarding methodological limitations, No/Very minor concerns regarding coherence, and No/Very minor concerns regarding relevance. Minor concerns regarding adequacy, because of limited data within the included studies which are specific to this review finding. | Alruwaili et al. 2025; Bawadi et al. 2020; Cai et al. 2022; Chu et al. 2017; Corona et al. 2025; Darivemula et al. 2024; Doering RM et al. 2015; Filby et al. 2020; Guðmundsdóttir et al. 2025; Henry et al. 2020; Iturralde et al. 2021; Johansson M. et al. 2025; Kirkendall & Dutt 2023; Konje & Konje 2021; Liu et al. 2017; Niner et al. 2013; Riggs et al. 2017; Vik et al. 2022; Wiseman et al. 2024; |
| 3 | B iii.  Continuity of care supports trusting therapeutic relationship development | No/Very minor concerns  **Explanation:** No/very minor concerns regarding methodological limitations because Most papers are methodologically sound, robustly reported and main gaps stem from lack of reporting around reflexivity of authors | No/Very minor concerns  **Explanation:** No/very minor concerns regarding coherence because no or limited concerns about the fit between the data from primary studies and the review finding | Minor concerns  **Explanation:** Minor concerns regarding adequacy because some concerns regarding the degree of richness or quantity of data supporting a review finding. | Minor concerns  **Explanation:** Minor concerns regarding relevance because some of the body of evidence from the primary studies is of partial relevance to the review question. | Moderate confidence  **Explanation:** No/Very minor concerns regarding methodological limitations, No/Very minor concerns regarding coherence, and Minor concerns regarding relevance. Minor concerns regarding adequacy, because of limited data within the included studies which are specific to this review finding. | Alsamman et al. 2025; Andrén et al. 2023; Benzaken T. et al. 2025; Biggs L.J. et al. 2025; Cai et al. 2022; Ceulemans et al. 2020; Evans et al. 2022; Filby et al. 2020; Garnweidner-Holme et al. 2017; Guðmundsdóttir et al. 2025; Henry et al. 2020; Johansson M. et al. 2025; Nagesh et al. 2024; Owens et al. 2016; Patízková & Glajchová 2024; Pope 2018; Rayment-Jones et al. 2021; Riggs et al. 2017; Rowe et al. 2023; Stapleton et al. 2013; Utne et al. 2020; Wiseman et al. 2024; |
| **CONSEQUENCES OF WOMEN’S NEGATIVE EXPERIENCES OF AND INTERACTIONS WITH MATERNITY STAFF IN HOST COUNTRIES** | | | | | | | |
| 4 | C i.  Lack of understanding of host healthcare system and medical terminology | No/Very minor concerns  **Explanation:** No/very minor concerns regarding methodological limitations because Most papers are methodologically sound, robustly reported and main gaps stem from lack of reporting around reflexivity of authors | No/Very minor concerns  **Explanation:** No/very minor concerns regarding coherence because no or limited concerns about the fit between the data from primary studies and the review finding | No/Very minor concerns  **Explanation:** No/very minor concerns regarding adequacy because no or limited concerns regarding the degree of richness or quantity of data supporting a review finding. | No/Very minor concerns  **Explanation:** No/very minor concerns regarding relevance because the body of evidence from the primary studies is of direct relevance to the the review question. | High confidence  **Explanation:** No/Very minor concerns regarding methodological limitations, No/Very minor concerns regarding coherence, No/Very minor concerns regarding adequacy, and No/Very minor concerns regarding relevance | ACM et al. 2024; Alsamman et al. 2025; Appiah-Kubi et al. 2024; Ayers et al. 2018; Bains et al. 2021; Bawadi et al. 2020; Belton et al. 2018; Benzaken T. et al. 2025; Biggs L.J. et al. 2025; Bitar & Oscarsson 2020; Cai et al. 2022; Carlsson et al. 2016; Ceulemans et al. 2020; Claerbout et al. 2024; Corona et al. 2025; Doering RM et al. 2015; Dullat et al. 2025; Engelhardt M. et al. 2025; Filby et al. 2020; Fitzgerald et al. 2016; Furness et al. 2025; Garnweidner-Holme et al. 2017; Gewalt et al. 2018; Granada et al. 2022; Guo et al. 2018; Guðmundsdóttir et al. 2025; Henry et al. 2020; Higginbottom et al. 2015; Higginbottom et al. 2016; Johansson M. et al. 2025; John et al. 2021; Johnsen et al. 2020; Kirkendall & Dutt 2023; Konje & Konje 2021; Lindsay et al. 2016; Lukasse et al. 2025; McClellan & Madler 2022; McEvoy et al. 2025; Nagesh et al. 2024; Niner et al. 2013; Origlia Ikhilor et al. 2019; Patízková & Glajchová 2024; Rambaldini‐Gooding et al. 2024; Rayment-Jones et al. 2021; Reid et al. 2021; Riggs et al. 2017; Rowe et al. 2023; Sami et al. 2019; Smith et al. 2025; Söderström et al. 2024; Ternström et al. 2023; Tobin et al. 2014; Topa et al. 2017; Utne et al. 2020; Velemínský et al. 2014; Vik et al. 2022; Wan et al. 2023; Yelland et al. 2016; |
| 5 | C ii.  Reduced access to, & lack of confidence in care. Disengagement from maternity care services | No/Very minor concerns  **Explanation:** No/very minor concerns regarding methodological limitations because Most papers are methodologically sound, robustly reported and main gaps stem from lack of reporting around reflexivity of authors | No/Very minor concerns  **Explanation:** No/very minor concerns regarding coherence because no or limited concerns about the fit between the data from primary studies and the review finding | No/Very minor concerns  **Explanation:** No/very minor concerns regarding adequacy because no or limited concerns regarding the degree of richness or quantity of data supporting a review finding. | Minor concerns  **Explanation:** Minor concerns regarding relevance because some of the body of evidence from the primary studies is of partial relevance to the the review question. | High confidence  **Explanation:** No/Very minor concerns regarding methodological limitations, No/Very minor concerns regarding coherence, No/Very minor concerns regarding adequacy, and Minor concerns regarding relevance | Alruwaili et al. 2025; Alsamman et al. 2025; Appiah-Kubi et al. 2024; Ayers et al. 2018; Bains et al. 2021; Belton et al. 2018; Biggs L.J. et al. 2025; Brown-Johnson et al. 2025; Cai et al. 2022; Ceulemans et al. 2020; Chu et al. 2017; Corona et al. 2025; Darivemula et al. 2024; Dullat et al. 2025; Engelhardt M. et al. 2025; Filby et al. 2020; Fitzgerald et al. 2016; Furness et al. 2025; Garnweidner-Holme et al. 2017; Guðmundsdóttir et al. 2025; Hatherall et al. 2016; Henry et al. 2020; Higginbottom et al. 2015; Higginbottom et al. 2016; John et al. 2021; Johnsen et al. 2020; Konje & Konje 2021; Li 2025; Malmström et al. 2022; Nagesh et al. 2024; Nithianandan et al. 2016; Origlia Ikhilor et al. 2019; Owens et al. 2016; Pullon et al. 2014; Rambaldini‐Gooding et al. 2024; Reid et al. 2021; Rowe et al. 2023; Smith et al. 2025; Stapleton et al. 2013; Tobin et al. 2014; Toke et al. 2024; Topa et al. 2017; Utne et al. 2020; Vik et al. 2022; Wikberg et al. 2014; Wiseman et al. 2024; Yelland et al. 2016; |
| 6 | C. iii  Isolation, negative self-perception, helplessness & dependence on others | No/Very minor concerns  **Explanation:** No/very minor concerns regarding methodological limitations because Most papers are methodologically sound, robustly reported and main gaps stem from lack of reporting around reflexivity of authors | No/Very minor concerns  **Explanation:** No/very minor concerns regarding coherence because no or limited concerns about the fit between the data from primary studies and the review finding | No/Very minor concerns  **Explanation:** No/very minor concerns regarding adequacy because no or limited concerns regarding the degree of richness or quantity of data supporting a review finding. | Minor concerns  **Explanation:** Minor concerns regarding relevance because some of the body of evidence from the primary studies is of partial relevance to the the review question. | High confidence  **Explanation:** No/Very minor concerns regarding methodological limitations, No/Very minor concerns regarding coherence, No/Very minor concerns regarding adequacy, and Minor concerns regarding relevance | Alsamman et al. 2025; Bains et al. 2021; Bawadi et al. 2020; Benzaken T. et al. 2025; Bitar & Oscarsson 2020; Brown-Johnson et al. 2025; Cai et al. 2022; Ceulemans et al. 2020; Chu et al. 2017; Claerbout et al. 2024; Doering RM et al. 2015; Dullat et al. 2025; Engelhardt M. et al. 2025; Evans et al. 2022; Fair et al. 2025; Filby et al. 2020; Fitzgerald et al. 2016; Gewalt et al. 2018; Granada et al. 2022; Higginbottom et al. 2016; John et al. 2021; Kirkendall & Dutt 2023; Li 2025; Lindsay et al. 2016; McClellan & Madler 2022; Niner et al. 2013; Origlia Ikhilor et al. 2019; Rayment-Jones et al. 2021; Riggs et al. 2017; Rowe et al. 2023; Sami et al. 2019; Stapleton et al. 2013; Tobin et al. 2014; Toke et al. 2024; Utne et al. 2020; Vik et al. 2022; Viken et al. 2015; Wikberg et al. 2014; |
| 7 | Civ.  Risk to safety of mother and/or baby | No/Very minor concerns  **Explanation:** No/very minor concerns regarding methodological limitations because Most papers are methodologically sound, robustly reported and main gaps stem from lack of reporting around reflexivity of authors | No/Very minor concerns  **Explanation:** No/very minor concerns regarding coherence because no or limited concerns about the fit between the data from primary studies and the review finding | No/Very minor concerns  **Explanation:** No/very minor concerns regarding adequacy because no or limited concerns regarding the degree of richness or quantity of data supporting a review finding. | Minor concerns  **Explanation:** Minor concerns regarding relevance because some of the body of evidence from the primary studies is of partial relevance to the the review question. | High confidence  **Explanation:** No/Very minor concerns regarding methodological limitations, No/Very minor concerns regarding coherence, No/Very minor concerns regarding adequacy, and Minor concerns regarding relevance | Alsamman et al. 2025; Andrén et al. 2023; Appiah-Kubi et al. 2024; Ayers et al. 2018; Bains et al. 2021; Biggs L.J. et al. 2025; Bitar & Oscarsson 2020; Brown-Johnson et al. 2025; Cai et al. 2022; Ceulemans et al. 2020; Chu et al. 2017; Corona et al. 2025; Darivemula et al. 2024; Doering RM et al. 2015; Dullat et al. 2025; Engelhardt M. et al. 2025; Evans et al. 2022; Filby et al. 2020; Fitzgerald et al. 2016; Furness et al. 2025; Garnweidner-Holme et al. 2017; Granada et al. 2022; Guðmundsdóttir et al. 2025; Hatherall et al. 2016; Henry et al. 2020; Higginbottom et al. 2015; Higginbottom et al. 2016; John et al. 2021; Konje & Konje 2021; Li 2025; Malmström et al. 2022; McClellan & Madler 2022; Niner et al. 2013; Owens et al. 2016; Rambaldini‐Gooding et al. 2024; Rayment-Jones et al. 2021; Reid et al. 2021; Rowe et al. 2023; Smith et al. 2025; Stapleton et al. 2013; Tobin et al. 2014; Toke et al. 2024; Topa et al. 2017; Utne et al. 2020; Vik et al. 2022; Viken et al. 2015; Wikberg et al. 2014; Worabo et al. 2024; Yelland et al. 2016; |
| 8 | Cv.  Lack of informed consent | No/Very minor concerns  **Explanation:** No/very minor concerns regarding methodological limitations because Most papers are methodologically sound, robustly reported and main gaps stem from lack of reporting around reflexivity of authors | No/Very minor concerns  **Explanation:** No/very minor concerns regarding coherence because no or limited concerns about the fit between the data from primary studies and the review finding | No/Very minor concerns  **Explanation:** No/very minor concerns regarding adequacy because no or limited concerns regarding the degree of richness or quantity of data supporting a review finding. | No/Very minor concerns  **Explanation:** No/very minor concerns regarding relevance because the body of evidence from the primary studies is of direct relevance to the the review question. | High confidence  **Explanation:** No/Very minor concerns regarding methodological limitations, No/Very minor concerns regarding coherence, No/Very minor concerns regarding adequacy, and No/Very minor concerns regarding relevance | ACM et al. 2024; Alruwaili et al. 2025; Appiah-Kubi et al. 2024; Ayers et al. 2018; Brown-Johnson et al. 2025; Cai et al. 2022; Cai et al. 2024; Ceulemans et al. 2020; Corona et al. 2025; Darivemula et al. 2024; Doering RM et al. 2015; Dullat et al. 2025; Engelhardt M. et al. 2025; Evans et al. 2022; Filby et al. 2020; Granada et al. 2022; Guðmundsdóttir et al. 2025; Henrique et al. 2023; Henry et al. 2020; Higginbottom et al. 2015; Higginbottom et al. 2016; Kirkendall & Dutt 2023; Konje & Konje 2021; Li 2025; Liu et al. 2017; Lukasse et al. 2025; McClellan & Madler 2022; Niner et al. 2013; Origlia Ikhilor et al. 2019; Patízková & Glajchová 2024; Rambaldini‐Gooding et al. 2024; Rowe et al. 2023; Tobin et al. 2014; Toke et al. 2024; Vik et al. 2022; Worabo et al. 2024; |
| 9 | C vi.  Perceptions of discrimination and racism. | No/Very minor concerns  **Explanation:** No/very minor concerns regarding methodological limitations because Most papers are methodologically sound, robustly reported and main gaps stem from lack of reporting around reflexivity of authors | No/Very minor concerns  **Explanation:** No/very minor concerns regarding coherence because no or limited concerns about the fit between the data from primary studies and the review finding | No/Very minor concerns  **Explanation:** No/very minor concerns regarding adequacy because no or limited concerns regarding the degree of richness or quantity of data supporting a review finding. | Minor concerns  **Explanation:** Minor concerns regarding relevance because some of the body of evidence from the primary studies is of partial relevance to the review question. | High confidence  **Explanation:** No/Very minor concerns regarding methodological limitations, No/Very minor concerns regarding coherence, No/Very minor concerns regarding adequacy, and Minor concerns regarding relevance | ACM et al. 2024; Appiah-Kubi et al. 2024; Bains et al. 2021; Bawadi et al. 2020; Benzaken T. et al. 2025; Biggs L.J. et al. 2025; Cai et al. 2022; Dullat et al. 2025; Engelhardt M. et al. 2025; Evans et al. 2022; Fair et al. 2025; Filby et al. 2020; Fitzgerald et al. 2016; Higginbottom et al. 2016; John et al. 2021; Li 2025; Lindsay et al. 2016; Nagesh et al. 2024; Niner et al. 2013; Origlia Ikhilor et al. 2019; Rambaldini‐Gooding et al. 2024; Rowe et al. 2023; Smith et al. 2025; Utne et al. 2020; Velemínský et al. 2014; Viken et al. 2015; Worabo et al. 2024; |
| 10 | C vii.  Accessing care outside of host health systems | No/Very minor concerns | No/Very minor concerns  **Explanation:** No/very minor concerns regarding coherence because no or limited concerns about the fit between the data from primary studies and the review finding | No/Very minor concerns  **Explanation:** No/very minor concerns regarding adequacy because no or limited concerns regarding the degree of richness or quantity of data supporting a review finding. | No/Very minor concerns  **Explanation:** No/very minor concerns regarding relevance because the body of evidence from the primary studies is of direct relevance to the review question. | High confidence  **Explanation:** No/Very minor concerns regarding methodological limitations, No/Very minor concerns regarding coherence, No/Very minor concerns regarding adequacy, and No/Very minor concerns regarding relevance | Alsamman et al. 2025; Andrén et al. 2023; Bains et al. 2021; Bawadi et al. 2020; Bitar & Oscarsson 2020; Boyvat et al. 2025; Cai et al. 2022; Cai et al. 2024; Carlsson et al. 2016; Ceulemans et al. 2020; Chu et al. 2017; Doering RM et al. 2015; Dullat et al. 2025; Fitzgerald et al. 2016; Guðmundsdóttir et al. 2025; Henry et al. 2020; John et al. 2021; Kirkendall & Dutt 2023; Liu et al. 2017; Nagesh et al. 2024; Owens et al. 2016; Rayment-Jones et al. 2021; Riggs et al. 2017; Rowe et al. 2023; Söderström et al. 2024; Toke et al. 2024; Topa et al. 2017; Utne et al. 2020; Vik et al. 2022; Wan et al. 2023; Wikberg et al. 2014; Wiseman et al. 2024; Worabo et al. 2024; |
| **INTERACTIONS WITH PROFESSIONAL INTERPRETERS** | | | | | | | |
| 11 | 1.1  Access to a suitable professional interpreter | No/Very minor concerns  **Explanation:** No/very minor concerns regarding methodological limitations because Main issues stem from lack of, or unclear reporting of reflexivity in the original papers. | No/Very minor concerns  **Explanation:** No/very minor concerns regarding coherence because no or limited concerns about the fit between the data from primary studies and the review finding | No/Very minor concerns  **Explanation:** No/very minor concerns regarding adequacy because no or limited concerns regarding the degree of richness or quantity of data supporting a review finding. | Minor concerns  **Explanation:** Minor concerns regarding relevance because some of the body of evidence from the primary studies is of partial relevance to the review question. | High confidence  **Explanation:** No/Very minor concerns regarding methodological limitations, No/Very minor concerns regarding coherence, No/Very minor concerns regarding adequacy, and Minor concerns regarding relevance | Alsamman et al. 2025; Ayers et al. 2018; Bains et al. 2021; Belton et al. 2018; Biggs L.J. et al. 2025; Bitar & Oscarsson 2020; Boyvat et al. 2025; Brown-Johnson et al. 2025; Ceulemans et al. 2020; Darivemula et al. 2024; Dube et al. 2024; Dullat et al. 2025; Engelhardt M. et al. 2025; Evans et al. 2022; Fitzgerald et al. 2016; Furness et al. 2025; Garnweidner-Holme et al. 2017; Gewalt et al. 2018; Granada et al. 2022; Guo et al. 2018; Guðmundsdóttir et al. 2025; Hatherall et al. 2016; Higginbottom et al. 2015; Johansson M. et al. 2025; John et al. 2021; Johnsen et al. 2020; Kirkendall & Dutt 2023; Konje & Konje 2021; Li 2025; Lindsay et al. 2016; McEvoy et al. 2025; Niner et al. 2013; Nithianandan et al. 2016; Origlia Ikhilor et al. 2019; Owens et al. 2016; Pope 2018; Rayment-Jones et al. 2021; Riggs et al. 2017; Rowe et al. 2023; Smith et al. 2025; Ternström et al. 2023; Toke et al. 2024; Utne et al. 2020; Velemínský et al. 2014; Wikberg et al. 2014; Willey et al. 2020; Worabo et al. 2024; Yelland et al. 2016; |
| 12 | 1.2  Positive interpersonal relationships with interpreters | No/Very minor concerns  **Explanation:** No/very minor concerns regarding methodological limitations because Most papers are methodologically sound, robustly reported and main gaps stem from lack of reporting around reflexivity of authors | No/Very minor concerns  **Explanation:** No/very minor concerns regarding coherence because no or limited concerns about the fit between the data from primary studies and the review finding | Minor concerns  **Explanation:** Minor concerns regarding adequacy because some concerns regarding the degree of richness or quantity of data supporting a review finding. | Minor concerns  **Explanation:** Minor concerns regarding relevance because some of the body of evidence from the primary studies is of partial relevance to the the review question. | Moderate confidence  **Explanation:** No/Very minor concerns regarding methodological limitations, No/Very minor concerns regarding coherence. We have moderate confidence because of minor concerns regarding adequacy, because of limited data within the included studies, and how much the included studies focused on research questions, which are specific to this review finding. | Bains et al. 2021; Bawadi et al. 2020; Biggs L.J. et al. 2025; Bitar & Oscarsson 2020; Brown-Johnson et al. 2025; Cai et al. 2022; Filby et al. 2020; Garnweidner-Holme et al. 2017; Granada et al. 2022; Johansson M. et al. 2025; John et al. 2021; Kirkendall & Dutt 2023; Lindsay et al. 2016; Lukasse et al. 2025; Origlia Ikhilor et al. 2019; Patízková & Glajchová 2024; Ternström et al. 2023; Toke et al. 2024; Wiseman et al. 2024; |
| 13 | 1.3  Use of telephone or other interpreting media | No/Very minor concerns  **Explanation:** No/very minor concerns regarding methodological limitations because Most papers are methodologically sound, robustly reported and main gaps stem from lack of reporting around reflexivity of authors | No/Very minor concerns  **Explanation:** No/very minor concerns regarding coherence because no or limited concerns about the fit between the data from primary studies and the review finding | No/Very minor concerns  **Explanation:** No/very minor concerns regarding adequacy because no or limited concerns regarding the degree of richness or quantity of data supporting a review finding. | Minor concerns  **Explanation:** Minor concerns regarding relevance because some of the body of evidence from the primary studies is of partial relevance to the the review question. | High confidence  **Explanation:** No/Very minor concerns regarding methodological limitations, No/Very minor concerns regarding coherence, No/Very minor concerns regarding adequacy, and Minor concerns regarding relevance | ACM et al. 2024; Alsamman et al. 2025; Andrén et al. 2023; Bains et al. 2021; Bawadi et al. 2020; Belton et al. 2018; Benzaken T. et al. 2025; Biggs L.J. et al. 2025; Bitar & Oscarsson 2020; Cai et al. 2022; Ceulemans et al. 2020; Claerbout et al. 2024; Corona et al. 2025; Doering RM et al. 2015; Dullat et al. 2025; Filby et al. 2020; Gallimore et al. 2020; Guo et al. 2018; Higginbottom et al. 2015; Higginbottom et al. 2016; John et al. 2021; Konje & Konje 2021; McClellan & Madler 2022; McEvoy et al. 2025; Pullon et al. 2014; Rambaldini‐Gooding et al. 2024; Rayment-Jones et al. 2021; Smith et al. 2025; Söderström et al. 2024; Utne et al. 2020; Velemínský et al. 2014; Vik et al. 2022; Wikberg et al. 2014; Willey et al. 2020; Yelland et al. 2016; |
| **WORK AROUNDS IN THE ABSENCE OF PROFESSIONAL INTERPRETER** | | | | | | | |
| 14 | 2.1  Language support from non-professional alternatives and specialist services | No/Very minor concerns  **Explanation:** No/very minor concerns regarding methodological limitations because Most papers are methodologically sound, robustly reported and main gaps stem from lack of reporting around reflexivity of authors | No/Very minor concerns  **Explanation:** No/very minor concerns regarding coherence because no or limited concerns about the fit between the data from primary studies and the review finding | No/Very minor concerns  **Explanation:** No/very minor concerns regarding adequacy because no or limited concerns regarding the degree of richness or quantity of data supporting a review finding. | No/Very minor concerns  **Explanation:** No/very minor concerns regarding relevance because the body of evidence from the primary studies is of direct relevance to the the review question. | High confidence  **Explanation:** No/Very minor concerns regarding methodological limitations, No/Very minor concerns regarding coherence, No/Very minor concerns regarding adequacy, and No/Very minor concerns regarding relevance | Alsamman et al. 2025; Andrén et al. 2023; Bains et al. 2021; Bawadi et al. 2020; Biggs L.J. et al. 2025; Cai et al. 2022; Ceulemans et al. 2020; Chu et al. 2017; Claerbout et al. 2024; Corona et al. 2025; Doering RM et al. 2015; Dullat et al. 2025; Engelhardt M. et al. 2025; Furness et al. 2025; Gallimore et al. 2020; Guðmundsdóttir et al. 2025; Hatherall et al. 2016; Henry et al. 2020; Johnsen et al. 2020; Konje & Konje 2021; Li 2025; Liu et al. 2017; McClellan & Madler 2022; Owens et al. 2016; Patízková & Glajchová 2024; Rayment-Jones et al. 2021; Riggs et al. 2017; Smith et al. 2025; Ternström et al. 2023; Tobin et al. 2014; Toke et al. 2024; Utne et al. 2020; Vik et al. 2022; Willey et al. 2020; Wiseman et al. 2024; Worabo et al. 2024; Yelland et al. 2016; |
| 15 | 2.2  Use of alternative communication strategies and good communication styles | No/Very minor concerns  **Explanation:** No/very minor concerns regarding methodological limitations because Most papers are methodologically sound, robustly reported and main gaps stem from lack of reporting around reflexivity of authors | No/Very minor concerns  **Explanation:** No/very minor concerns regarding coherence because no or limited concerns about the fit between the data from primary studies and the review finding | No/Very minor concerns  **Explanation:** No/very minor concerns regarding adequacy because no or limited concerns regarding the degree of richness or quantity of data supporting a review finding. | No/Very minor concerns  **Explanation:** No/very minor concerns regarding relevance because the body of evidence from the primary studies is of direct relevance to the the review question. | High confidence  **Explanation:** No/Very minor concerns regarding methodological limitations, No/Very minor concerns regarding coherence, No/Very minor concerns regarding adequacy, and No/Very minor concerns regarding relevance | Bains et al. 2021; Benzaken T. et al. 2025; Biggs L.J. et al. 2025; Brown-Johnson et al. 2025; Cai et al. 2022; Carlsson et al. 2016; Ceulemans et al. 2020; Chu et al. 2017; Corona et al. 2025; Darivemula et al. 2024; Dube et al. 2024; Dullat et al. 2025; Filby et al. 2020; Henry et al. 2020; Higginbottom et al. 2015; Johansson M. et al. 2025; Johnsen et al. 2020; Lukasse et al. 2025; McClellan & Madler 2022; Nagesh et al. 2024; Niner et al. 2013; Origlia Ikhilor et al. 2019; Owens et al. 2016; Rambaldini‐Gooding et al. 2024; Ternström et al. 2023; Toke et al. 2024; Wan et al. 2023; Wikberg et al. 2014; Willey et al. 2020; Wiseman et al. 2024; Yelland et al. 2016; |
